# 1 Growth and adaptation mechanisms of tumour spheroids with 2 time-dependent oxygen availability

3 Ryan J. Murphy<sup>1,\*</sup>, Gency Gunasingh<sup>2</sup>, Nikolas K. Haass<sup>2,†</sup>, Matthew J. Simpson<sup>1,†</sup>

4 <sup>1</sup> *Mathematical Sciences, Queensland University of Technology, Brisbane, Australia*

5 <sup>2</sup> *The University of Queensland Diamantina Institute, The University of Queensland, Brisbane,*  
6 *Australia*

## 7 **Abstract**

8 Tumours are subject to external environmental variability. However, *in vitro* tumour spheroid  
9 experiments, used to understand cancer progression and develop cancer therapies, have been  
10 routinely performed for the past fifty years in constant external environments. Furthermore,  
11 spheroids are typically grown in ambient atmospheric oxygen (normoxia), whereas most *in vivo*  
12 tumours exist in hypoxic environments. Therefore, there are clear discrepancies between *in*  
13 *vitro* and *in vivo* conditions. We explore these discrepancies by combining tools from exper-  
14 imental biology, mathematical modelling, and statistical uncertainty quantification. Focusing  
15 on oxygen variability to develop our framework, we reveal key biological mechanisms govern-  
16 ing tumour spheroid growth. Growing spheroids in time-dependent conditions, we identify and  
17 quantify novel biological adaptation mechanisms, including unexpected necrotic core removal,  
18 and transient reversal of the tumour spheroid growth phases.

---

\*Corresponding author: [r23.murphy@qut.edu.au](mailto:r23.murphy@qut.edu.au)

†These authors contributed equally.

## 19 **1 Introduction**

20 *In vivo* tumours are subject to various types of environmental variability, for example due to fluctuating oxygen and nutrient availability [1–4]. To study cancer progression and develop cancer therapies, tumour spheroid experiments have been successfully and routinely performed for the past 22 fifty years [2, 5–12]. However, tumour spheroid experiments are typically performed in constant 24 environments and focus on the overall size of spheroids [2, 13–18]. By experimentally controlling 25 oxygen availability and using mathematical modelling and statistical uncertainty quantification, we 26 develop a new framework to study the impact of external environmental variability on the growth of 27 tumour spheroids and their internal structure. Using our framework we identify and quantify novel 28 biological adaptation mechanisms driven by environmental variability. This work begins to bridge 29 the gap between *in vitro* and *in vivo* conditions, and lays the foundation for future experimental, 30 mathematical, and statistical spheroid studies.

31 Oxygen availability is of particular importance since it is vital to the effectiveness of cancer 32 therapies, such as chemotherapy and radiotherapy [1, 19, 20], and can be controlled in spheroid 33 experiments. However, spheroid experiments are typically performed in ambient atmospheric conditions 34 (21% oxygen), sometimes referred to as normoxia [13, 16]. In contrast, untreated tumours 35 typically grow in variable hypoxic conditions (0.3–4.2% oxygen) [1, 20–22]. While many single-cell 36 studies, and some spheroid studies, explore the role of environmental variability [2, 22–27], oxygen 37 parameters critical to reproduce results are commonly not reported [28].

38 To visualise spheroid growth in normoxia, hypoxia, and time-dependent oxygen conditions we 39 use fluorescent ubiquitination cell cycle indicator (FUCCI) transduced cell lines and hypoxia markers 40 (Figure 1a–e) [13, 14, 29, 30]: nuclei of cells in gap 1 (G1) phase fluoresce red, shown in magenta 41 for clarity (Figure 1d); nuclei of cells in synthesis, gap 2, and mitotic (S/G2/M) phases fluoresce 42 green (Figure 1d); and, regions of hypoxia are indicated by cyan (Figure 1b,c,e). Spheroids grown 43 in constant normoxia experience three phases of growth (Figure 1a–c,f). In phase (i) spheroids grow 44 exponentially as all cells are able to proliferate, indicated by the presence of cells in the S/G2/M 45 phases throughout the tumour spheroid shown by green (Figure 1a). In phase (ii) cells in the central 46 region of the spheroid arrest in G1 phase while cells at the periphery continue to proliferate resulting 47 in inhibited growth (Figure 1b). This arrested region is thought to arise due spatial differences in 48 nutrient availability, possibly oxygen, and/or a build up of metabolic waste from cells. In phase 49 (iii) the spheroid is characterised by three regions: a central region composed of a necrotic core, 50  $0 < r < R_n(t)$ ; an intermediate region of living but proliferation-inhibited cells,  $R_n(t) < r < R_i(t)$ ; 51 and, a region at the periphery composed of living and proliferating cells,  $R_i(t) < r < R_o(t)$  (Figure 52 1c). In comparison to spheroids grown in normoxia, spheroids grown in hypoxia form their necrotic 53 core earlier, the distance from the edge of the spheroid to the hypoxic region and overall size are 54 smaller (Figure 2).

55 To investigate environmental variability we perform additional experiments in time-dependent

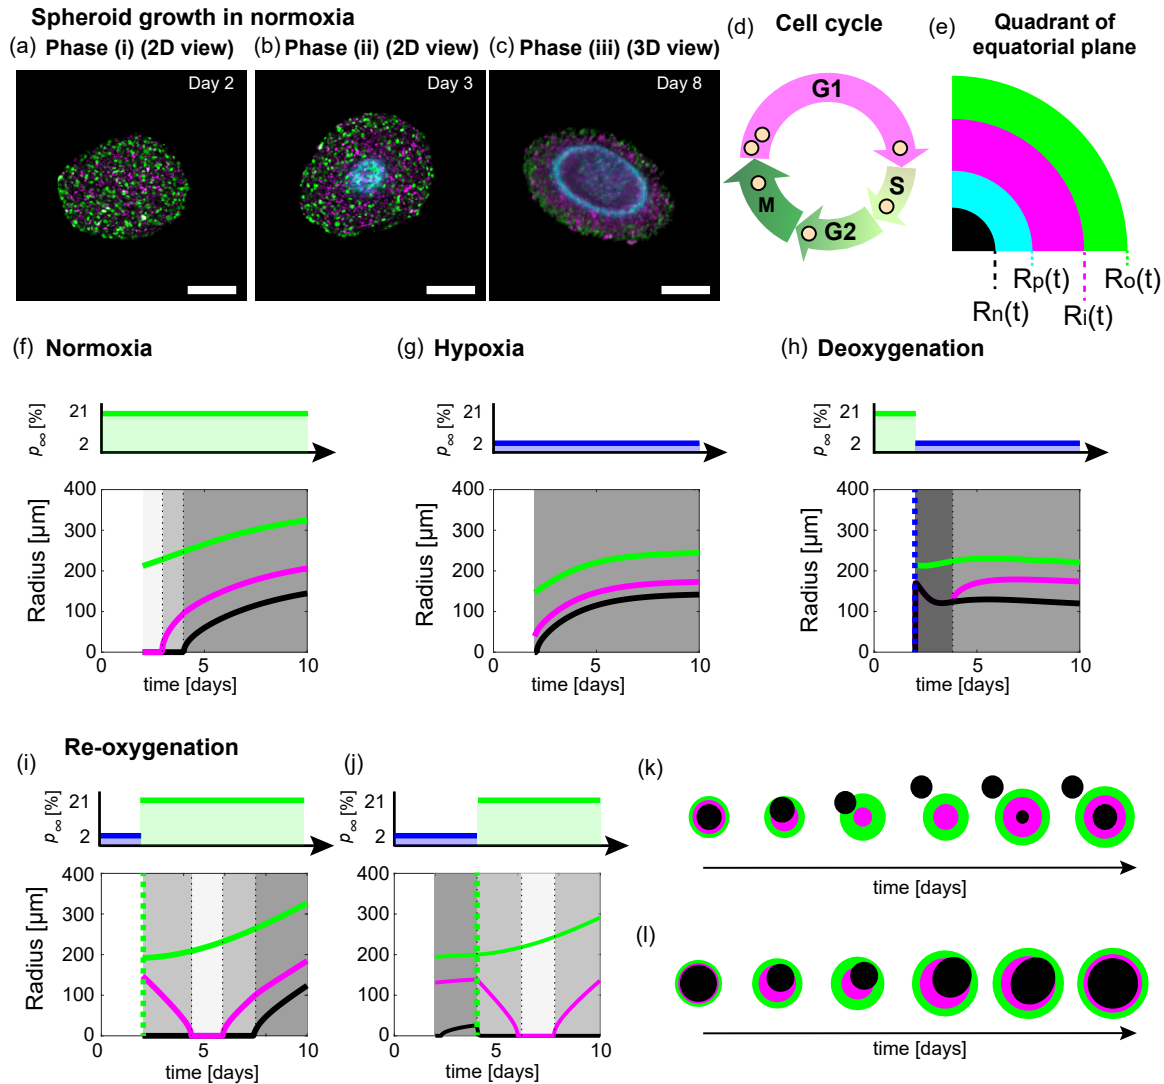

Figure 1: Impact of external environment on the structure of growing tumour spheroids: a focus on oxygen availability. (a-c) Tumour spheroid growth in standard experimental protocols occurs in three phases. Experimental images shown for Fucci-transduced human melanoma WM983b spheroids grown in normoxia. (a-b) Experimental images of the equatorial plane of spheroids on Day 2 and 3 after seeding. (c) 3D z-stack representation of half of a spheroid on Day 8 after seeding. Scale bars are 200 $\mu$ m. Colours in (a-c) correspond to cell cycle schematic shown in (d): cells in G1 phase (magenta) and cells in S/G2/M phase (green). Pimonidazole staining reveals the hypoxic regions of spheroid (cyan). (e) Schematic for spherically symmetric spheroid structure representing a quadrant of the equatorial plane of a spheroid. Spheroids in normoxia experience three phases of growth, resulting in a spheroid with three regions at later times: a central region composed of a necrotic core,  $0 < r < R_n(t)$  (black); an intermediate region of living but proliferation-inhibited cells,  $R_n(t) < r < R_i(t)$  (magenta); and, a region at the periphery composed of living and proliferating cells,  $R_i(t) < r < R_o(t)$  (green). The hypoxic radius,  $R_p(t)$  (cyan) satisfies  $R_n(t) \leq R_p(t) \leq R_o(t)$ . (f-j) Schematics for oxygen conditions and time evolution of spheroid structure and overall size in (f) normoxia, (g) hypoxia, (h) deoxygenation experiments, and (i-j) re-oxygenation experiments. Note in (i-j) spheroids transiently undergo the growth phases in reverse. Greyscale shading in (f-j) represent growth phases. (k-l) Spheroid schematics showing (k) necrotic core removal and (l) movement of necrotic core without removal.

56 oxygen conditions. In these experiments we observe various tumour spheroid adaptation mechanisms  
57 (Figure 1h-l). For instance, in re-oxygenation experiments we discover a novel adaptation process  
58 where the necrotic core of the spheroid that has formed prior to re-oxygenation moves within the  
59 spheroid and in certain situations exits the spheroid as a single object (Figure 1k). Further, for  
60 fifty years tumour spheroid growth has been described by three sequential growth phases but re-  
61 oxygenation experiments show that spheroids can transiently experience these phases in the reverse  
62 order (Figure 1i,j). Other observations from these experiments agree with intuitive expectations,  
63 but have not previously been explored nor quantified.

64 Throughout this study we quantitatively analyse experimental data using mathematical modelling  
65 and statistical uncertainty quantification. We start with the seminal Greenspan mathematical model  
66 [10, 15, 16, 31]. Greenspan's model describes the three phases of growth and is relatively simple in  
67 comparison to other models [31–34]. This simplicity is a great advantage. We are able to extend  
68 the model to analyse environmental variability while retaining physical and biologically insightful  
69 interpretations of results. Further, by using parameter identifiability analysis, with both profile  
70 likelihood and Bayesian inference approaches, we estimate key biological parameters and reveal  
71 biological adaptation mechanisms.

72 In the following we first analyse spheroid experiments in normoxia and hypoxia. Such experiments  
73 demonstrate that Greenspan's model describes the experimental data remarkably well. Further, that  
74 oxygen mechanisms accurately describe the growth and formation of the necrotic core, whereas other  
75 mechanisms, possibly waste mechanisms, likely result in the growth and formation of the inhibited  
76 region. We then extend the mathematical model to interpret deoxygenation and re-oxygenation  
77 experiments, providing quantitative insights to biological adaptation mechanisms throughout. We  
78 conclude by describing the unexpected behaviours observed in re-oxygenation experiments.



## 2 Results

Here we focus on WM983b spheroids in normoxia, hypoxia and deoxygenation experiments. Similar results for WM793b and WM164 spheroids are discussed in Supplementary Discussion E - F. For re-oxygenation experiments, we compare results from WM983b and WM793b spheroids as we observe a range of behaviours. In Supplementary Discussion F we discuss additional WM164 re-oxygenation experiments.

### 2.1 Oxygen diffusion alone is insufficient to describe spheroid growth

We capture end-point equatorial plane images for spheroids grown in normoxia and hypoxia measuring  $R_o(t)$ ,  $R_i(t)$ ,  $R_n(t)$ , and  $R_p(t)$  (Figure 2a,c,d,f) (Methods: Image processing). These measurements are remarkably consistent within each condition and time point (Figures 2c,f). Comparing spheroids grown in normoxia and hypoxia, we observe vastly different tumour growth dynamics and internal structure ( $\xi_n(t) = R_n(t)/R_o(t)$ ,  $\xi_i(t) = R_i(t)/R_o(t)$ ,  $\xi_p(t) = R_p(t)/R_o(t)$ ), even when comparing spheroids of similar size (Figures 2c,f, S21).

For deeper mechanistic insight we use mathematical modelling and statistical uncertainty quantification to interpret our observations. Specifically, we show that Greenspan's mathematical model [10] accurately describes spheroid growth in both normoxia and hypoxia. Then using parameter estimation we identify biological mechanisms that differ between normoxia and hypoxia. Key model details are now discussed, for further details see Methods 4.1.1 and Supplementary Discussion C.1. The model assumes each spheroid is spherically symmetric and maintained by cell-cell adhesion or surface tension. The independent variables are time  $t$  [days], and radial position,  $r$  [ $\mu\text{m}$ ]. Conservation of volume gives an equation describing the time evolution of the outer radius,  $R_o(t)$  [ $\mu\text{m}$ ],

$$R_o^2(t) \frac{dR_o(t)}{dt} = \frac{s}{3} [R_o^3(t) - \max(R_i^3(t), R_n^3(t))] - \lambda R_n^3(t), \quad (1)$$

where  $s$  [ $\text{day}^{-1}$ ] is the rate at which cell volume is produced by mitosis per unit volume of living cells, and  $\lambda$  [ $\text{day}^{-1}$ ] is the proportionality constant describing the rate at which cell volume is lost from the necrotic core. In these experiments, Equation (1) simplifies as  $R_i(t) \geq R_n(t)$ . This restricts our attention to two interpretations of the model that differ with respect to how  $R_i(t)$  is defined. In the following discussion, we refer to these interpretations as *hypotheses* and show that hypothesis 2, where oxygen mechanisms drive  $R_n(t)$  and waste mechanisms drive  $R_i(t)$ , is more consistent with the spheroids considered in this study.

In hypothesis 1 (Figure 3a), oxygen diffuses with diffusivity,  $k$  [ $\text{m}^2 \text{s}^{-1}$ ], and is consumed by living cells at a constant rate,  $\alpha$  [ $\text{m}^3 \text{kg}^{-1} \text{s}^{-1}$ ]. The external oxygen partial pressure is  $p_\infty$  [%]. Oxygen diffusion is fast relative to the growth of the spheroid, so that the oxygen partial pressure within the

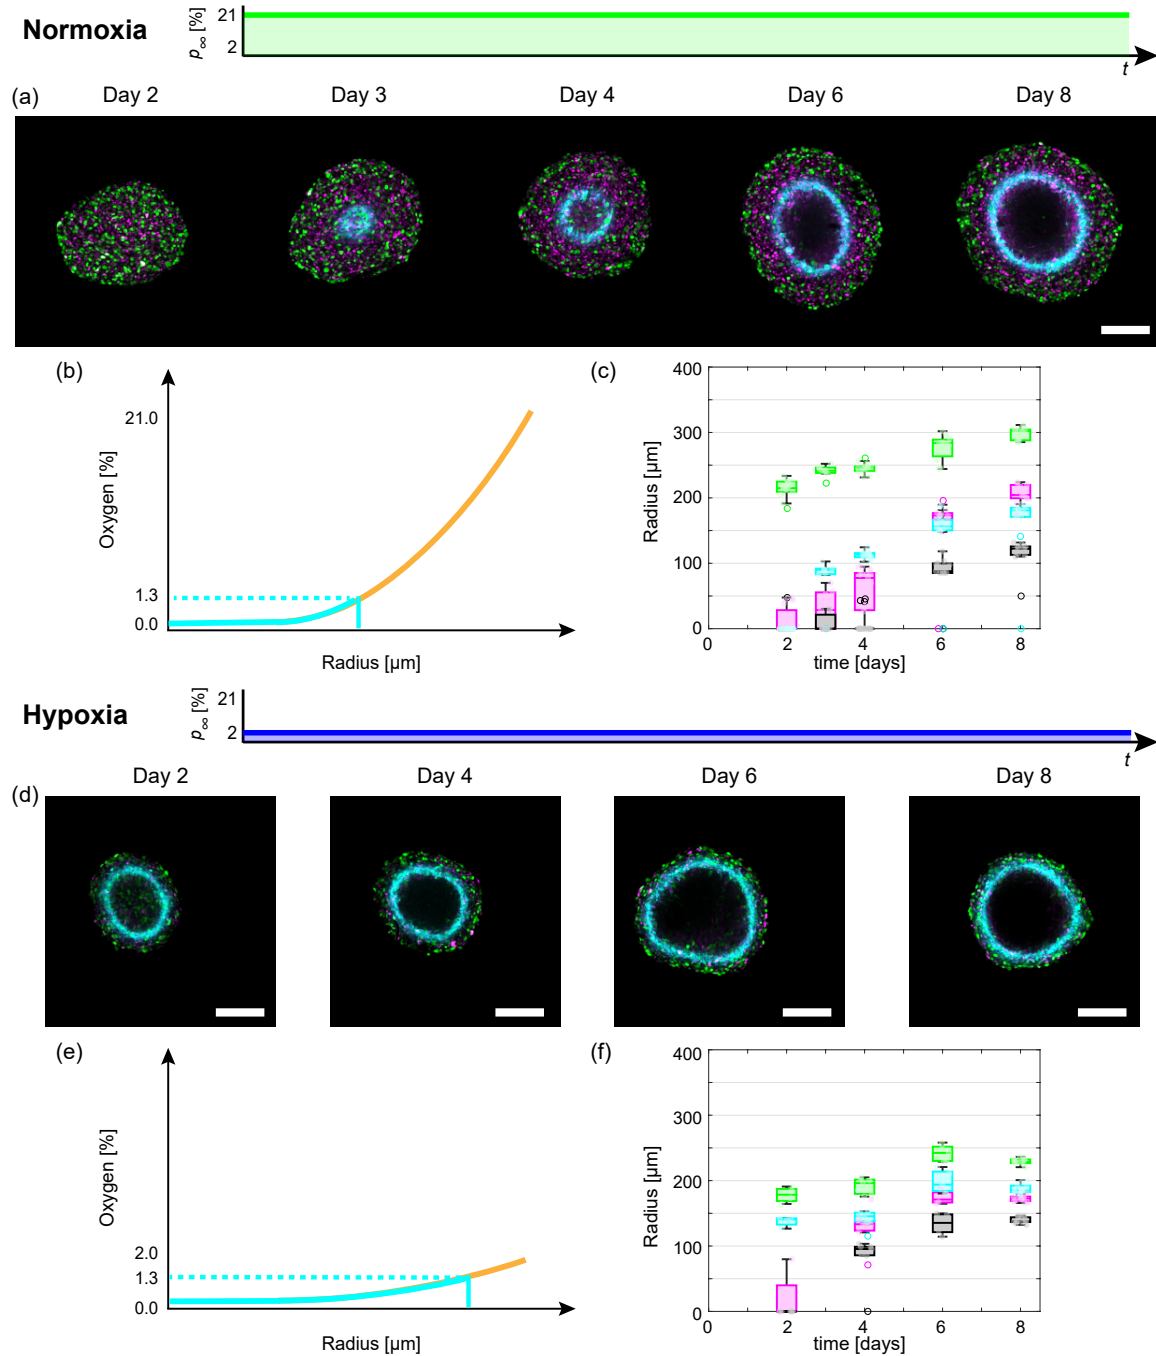

Figure 2: Tumour spheroid growth in normoxia and hypoxia. (a,d) Experimental images of the equatorial plane of Fucci-transduced WM983b spheroids grown in (a) normoxia (21% oxygen) and (b) hypoxia (2% oxygen). (a) Images shown on Day 2, 3, 4, 6, and 8 after seeding. (d) Images shown in Day 2, 4, 6, and 8 after seeding. Scale bars are 200 $\mu\text{m}$ . (b,e) Schematics for oxygen partial pressure within spheroids for (b) normoxia and (e) hypoxia. (c,f) Time-evolution of  $R_o(t)$  (green),  $R_i(t)$  (magenta),  $R_n(t)$  (black), and  $R_p(t)$  (cyan) for spheroids grown in (c) normoxia, and (f) hypoxia. Note that each spheroid measurement is an end-point measurement.

110 spheroid,  $p(r(t))$  for  $0 \leq r \leq R_o(t)$ , is governed by

$$\frac{k}{r^2} \frac{\partial}{\partial r} \left( r^2 \frac{\partial}{\partial r} p(r(t)) \right) = \Omega \alpha \text{H}(r - R_n(t)) \text{H}(R_o(t) - r), \quad 0 \leq r \leq R_o(t), \quad (2)$$

111 where  $\text{H}(\cdot)$  is the heaviside function and  $\Omega$  [mmHg kg m<sup>-3</sup>] is a conversion constant from volume of  
112 oxygen per unit tumour mass to oxygen partial pressure [35]. The inhibited radius,  $R_i(t)$ , is implicitly  
113 defined by  $p(r(t)) = p_i$  [%] provided the oxygen partial pressure is sufficiently large (Figure 3a), and  
114  $R_i(t) = 0$  otherwise.

115 In hypothesis 2 (Figure 3b), diffusible metabolic waste is produced by living cells at a constant rate  
116 per unit volume,  $P$  [mol  $\mu\text{m}^{-3}$  day<sup>-1</sup>], and diffuses with diffusivity  $\kappa$  [ $\mu\text{m}^2$  day<sup>-1</sup>]. Waste diffusion  
117 is fast relative to the growth of the spheroid, so the waste concentration within the spheroid,  $\beta(r(t))$   
118 [mol  $\mu\text{m}^{-3}$ ], is governed by

$$\frac{\kappa}{r^2} \frac{\partial}{\partial r} \left( r^2 \frac{\partial}{\partial r} \beta(r(t)) \right) = -PH(r - R_n(t)) \text{H}(R_o(t) - r), \quad 0 \leq r \leq R_o(t). \quad (3)$$

119 The inhibited radius,  $R_i(t)$ , is implicitly defined through  $\beta(r(t)) = \beta_i$  [mol  $\mu\text{m}^{-3}$ ] provided the waste  
120 concentration is sufficiently large (Figure 3b), and  $R_i(t) = 0$  otherwise.

121 Both hypothesis 1 and 2 assume that  $R_n(t)$  is implicitly defined by  $p(R_n(t)) = p_n$  provided the  
122 oxygen partial pressure is sufficiently small, and  $R_n(t) = 0$  otherwise. Informed by experimental  
123 results [35], we set  $p_n = 0$  [%].

124 Analysis of the model provides an analytical expression for the time when the inhibited region  
125 forms (Equation 7.1). For hypothesis 2, the inhibited region is predicted to form at the same time  
126 independent of oxygen dynamics, provided the spheroids grown in normoxia and hypoxia are initially  
127 the same size. This appears consistent with results in Figure 2a-d where the inhibited region has  
128 formed on day 2 for both conditions. In contrast, with hypothesis 1 the time to form the inhibited  
129 region depends on oxygen mechanisms and specifically  $p_\infty$ , but without knowledge of additional  
130 parameters further insights are unclear.

131 By incorporating statistical uncertainty quantification to estimate parameters of the model we  
132 gain further mechanistic insights. A key assumption common to hypothesis 1 and 2 is that oxygen  
133 diffusion and consumption drives the time evolution of  $R_n(t)$ . We test this assumption directly by  
134 analysing radius measurements of each spheroid at each time point independently [35]. Using mea-  
135 surements of  $R_o(t)$  and  $R_n(t)$  we estimate: the outer radius when the necrotic region first forms,  $R_c$ ;  
136  $\alpha$ ; and  $R_p(t)$  (Figure 3c-d, Supplementary Discussion D.1.1). Image processing to measure  $R_p(t)$  is  
137 more challenging than for  $R_o(t)$  due to gradients in the pimonidazole signal (Supplementary Discus-  
138 sion B). However, after careful image processing we find good agreement between experimentally  
139 measured and predicted values of  $R_p(t)$  ( $R^2 = 0.749$ , Figure 3e). This approach allows us to esti-  
140 mate the oxygen partial pressure within each spheroid at each time point (Figure 3g-h). From the  
141 results in Figures 3e,g,h, S22 we conclude that oxygen of diffusion alone is a reasonable and sufficient  
142 mechanism to describe the formation of the necrotic core in WM983b spheroids [35]. Furthermore,

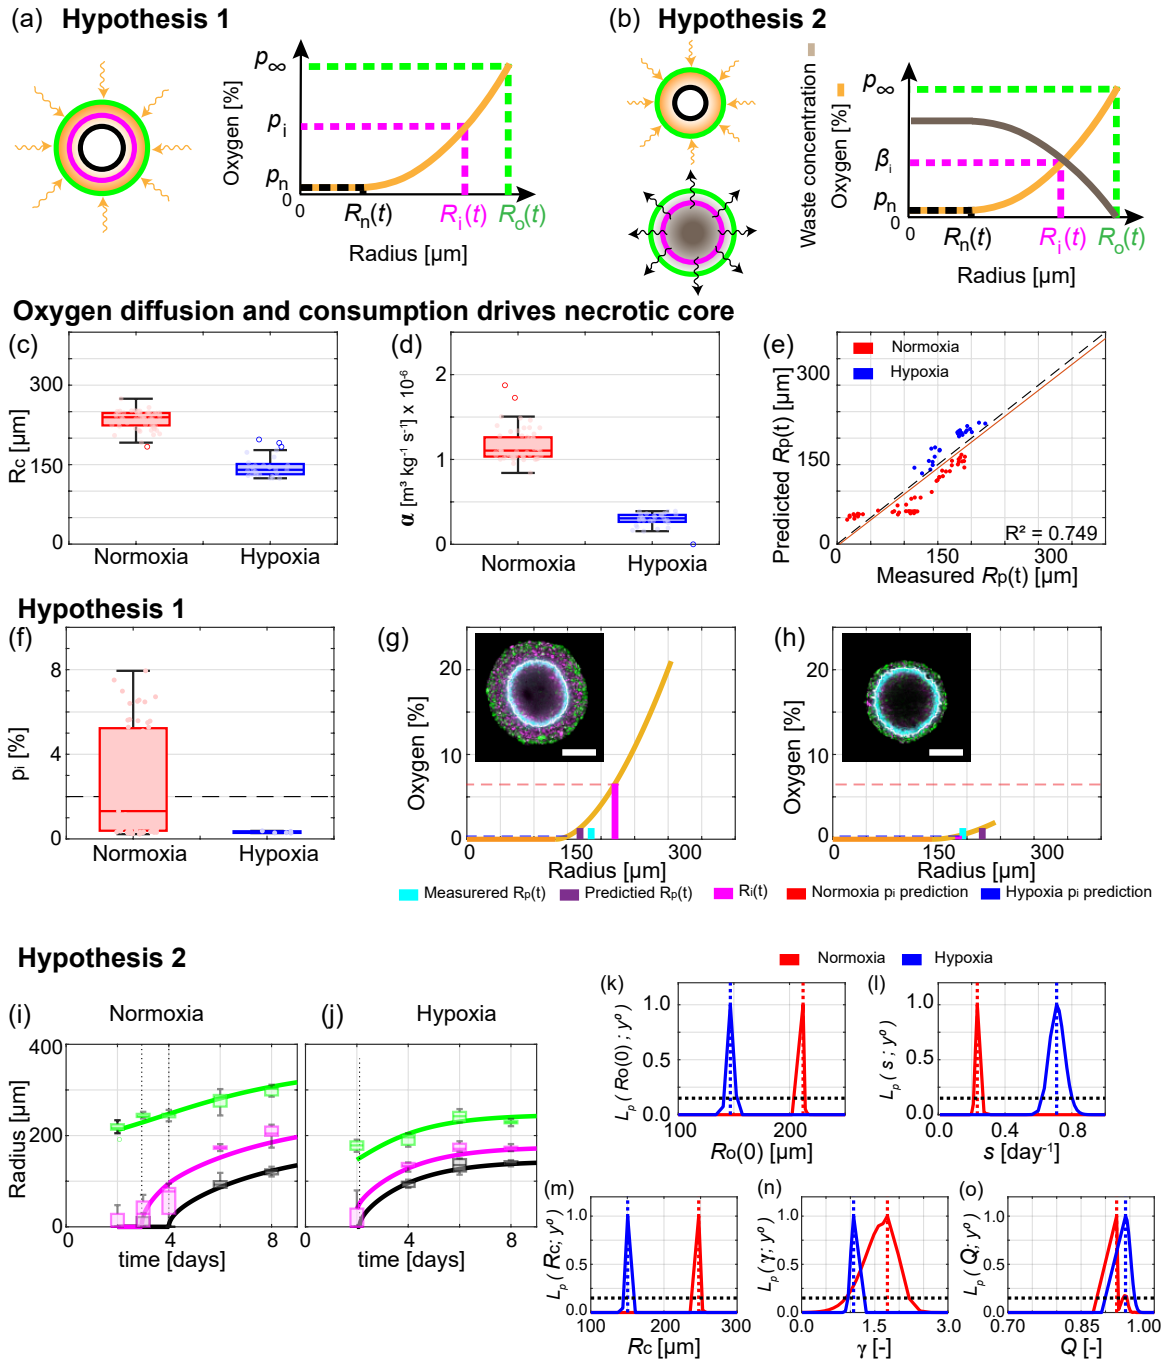

Figure 3: (Caption next page).

Figure 3: Mechanisms governing tumour spheroid growth in normoxia and hypoxia. (a,b) Schematics for two hypotheses. (a) Oxygen mechanisms describe  $R_i(t)$  and  $R_n(t)$ . (b) Oxygen mechanisms describe  $R_n(t)$  and waste mechanisms describe  $R_i(t)$ . (c-e) Oxygen diffusion and consumption describes  $R_n(t)$ . (c) Box chart for estimated outer radius when necrotic region forms,  $R_c$  [ $\mu\text{m}$ ]. (d) Box chart for estimated oxygen consumption rate,  $\alpha$  [ $\text{m}^3 \text{kg}^{-1} \text{s}^{-1}$ ]. (e) Comparison of measured and predicted  $R_p(t)$ . (f) Box chart for estimated oxygen partial pressure defining inhibited region from hypothesis 1,  $p_i$  [%]. (g-h) Estimated oxygen partial pressure within (g) a spheroid grown in normoxia and (h) a spheroid grown in hypoxia. Insets in (f,g) show Fucci signal and pimonidazole staining from Day 8 and 6, respectively, with scale bar is  $200 \mu\text{m}$ . In (c-f) data points for normoxia and hypoxia shown in red and blue, respectively. (i,j) Comparison of experimental data with Greenspan's mathematical model simulated with the maximum likelihood estimates of parameters for (i) normoxia and (j) hypoxia. Time-evolution of outer radius,  $R_o(t)$  (green), inhibited radius,  $R_i(t)$  (magenta), and necrotic radius,  $R_n(t)$  (black). Data represent an average of twelve spheroids on days 2, 3, 4, 6, and 8 for spheroids grown in normoxia and an average of seven spheroids on days 2, 4, 6, and 8 for spheroids grown in hypoxia (Methods: Experimental methods 4.3). (k-o) Profile likelihoods for (k) initial outer radius,  $R_o$  [ $\mu\text{m}$ ], (l) proliferation rate,  $s$  [ $\text{day}^{-1}$ ], (m) outer radius when necrotic region first forms,  $R_c$  [ $\mu\text{m}$ ], (n) dimensionless parameter relating proliferation rate and mass loss from necrotic core,  $\gamma$  [-], and (o) dimensionless parameter relating oxygen and waste mechanisms,  $Q$  [-] (Methods 4.1.1).

143 these results suggest that the following assumptions are reasonable:  $p_n = 0$ ; a constant oxygen con-  
144 sumption rate within the spheroid; spherical symmetry; oxygen at the edge of the spheroid can be  
145 approximated with the oxygen settings on the incubator.

146 Given that  $R_n(t)$  is reasonably described by oxygen mechanisms we now examine hypothesis 1.  
147 Hypothesis 1 assumes that oxygen mechanisms alone drive the time evolution of  $R_i(t)$ . We then  
148 estimate  $p_i$  using the estimated oxygen partial pressure within each spheroid,  $p(r(t))$  for  $0 < r <$   
149  $R_o(t)$ , measurements of  $R_i(t)$  and the definition  $p(R_i(t)) = p_i$  (Figure 3a,g,h). Estimates of  $p_i$  are  
150 consistently larger for spheroids grown in normoxia compared to spheroids grown in hypoxia (Figure  
151 3f). This is inconsistent with hypothesis 1. Specifically, results from normoxia suggest that spheroids  
152 grown in hypoxia should have larger inhibited regions than experimentally measured (Figure 3g,h).  
153 Similarly, results from spheroids grown in hypoxia suggest that spheroids grown in normoxia should  
154 have smaller inhibited regions than experimentally measured. These results provide strong evidence  
155 to suggest that oxygen alone is insufficient to describe the formation of the inhibited region across  
156 multiple oxygen conditions for this cell line, consistent with results for other cell lines [17].

157 To test hypothesis 2, which assumes that waste mechanisms drive the time evolution of  $R_i(t)$ ,  
158 we first analyse measurements of each spheroid at each time point independently. Experimentally  
159 measuring waste within spheroids is challenging, so we estimate the waste concentration within each  
160 spheroid and use measurements of  $R_i(t)$  to estimate the outer radius when the inhibited region first  
161 forms,  $\mathcal{R} = \beta_i \kappa / P$  (Figure S23). We observe that  $\mathcal{R}$  is larger for spheroids grown in normoxia than  
162 hypoxia, which may be due to changes in  $\beta_i$  or  $P$  or  $\kappa$  (Figure S23). These results do not provide  
163 sufficient evidence to reject hypothesis 2.

164 To test whether hypothesis 2 is reasonable we estimate model parameters for spheroids grown in  
165 normoxia and hypoxia. Specifically, we estimate the five key parameters:  $\Theta_g = (R_o(0), s, R_c, \gamma, Q)$ ,  
166 where  $\gamma = \lambda/s$  [-] and  $Q$  [-] are dimensionless quantities (Methods 4.2). Simulating the model

167 with the maximum likelihood estimate (MLE),  $\hat{\Theta}_n$ , for normoxia shows good agreement with the  
168 experimental data from spheroids grown in normoxia (Figure 3i). Similarly, simulating the model at  
169  $\hat{\Theta}_h$  for hypoxia shows good agreement with the experimental data from spheroids grown in hypoxia  
170 (Figure 3j). These results suggest the model accurately captures the dynamics of tumour spheroid  
171 growth.

172 Alongside the point estimates  $\hat{\Theta}_n$  and  $\hat{\Theta}_h$ , we are interested in forming approximate 95% con-  
173 fidence intervals for each of the parameters. To perform this analysis we employ profile likelihood  
174 analysis (Methods 4.2). All profile likelihoods computed here are narrow and well-formed around a  
175 single central peak, the MLE, indicating that parameters are identifiable and that a relatively narrow  
176 range of parameters give a similar match to the data as the MLE (Figure 3k-o) [16]. Approximate  
177 95% confidence intervals are obtained from these profile likelihoods for each parameter. The profile  
178 likelihoods for the initial outer radius,  $R_o(0)$ , do not overlap and agree with observations that  $R_o(0)$   
179 is smaller for spheroids grown in hypoxia than normoxia (Figure 3k). The profile likelihood for  $s$   
180 interestingly estimates that the rate of cell proliferation per unit volume is faster in hypoxia than  
181 normoxia (Figure 3l). This result may seem surprising as a simplistic assumption would be that less  
182 oxygen results in less proliferation. However, our result is consistent with observations from other cell  
183 lines where an intermediate level of hypoxia encourages more proliferation than normoxia [36–38].  
184 Profile likelihoods for  $R_c$  are consistent with estimates of  $R_c$  obtained by analysing spheroid mea-  
185 surements independently, a good consistency check for the two methods (Figure 3c,m). The other  
186 profile likelihoods for  $\gamma$  and  $Q$  overlap suggesting that these parameters are consistent across nor-  
187 moxic and hypoxic conditions (Figure 3n,o). Posterior densities and prediction intervals, estimated  
188 using Bayesian inference, also show good agreement with results here and the experimental data  
189 (Figure S24). Similar results hold for the other two cell lines (Supplementary Discussion E-F).

190 In the remainder of this study, we take the most fundamental approach and proceed with  
191 Greenspan’s mathematical model and interpret the governing mechanisms with hypothesis 2. We  
192 note that other biological mechanisms may also be relevant. However, as the model already appears  
193 to capture the key dynamics (Figure 3i,j) we will avoid overcomplicating the model. Furthermore, in  
194 the following analysis of deoxygenation and re-oxygenation experiments we necessarily extend the  
195 model.

## 196 2.2 Adaptation to deoxygenation

197 The mechanisms underlying how tumour spheroids adapt to time-dependent external environments  
198 is unclear. Here, we perform a series of deoxygenation experiments, where spheroids grown in nor-  
199 moxia are transferred to hypoxic conditions at  $t = t_s$  [days]. Analysing spheroid snapshots reveals  
200 how spheroids, and in particular their internal structure, adapt. Extending Greenspan's mathe-  
201 matical model and using parameter estimation, we identify and quantify key biological adaptation  
202 mechanisms.

203 In the deoxygenation experiments we set  $p_\infty = 21$  [%] for  $0 < t \leq t_s$  [days],  $p_\infty = 2$  [%] for  
204  $t_s < t < 8$  [days], and  $t_s = 2$  [days] (Figure 4a). At  $t_s = 2$  [days] all spheroids are in phase (i) of  
205 growth with proliferating cells throughout and no inhibited or necrotic region (Day 2 of Figure 4b).  
206 At  $t_s + 1$  [days] the FUCCI signal in the central region of the spheroid is blurred, relative to the  
207 signal at the periphery, indicating dying and dead cells (Day 3 of Figure 4b, Figure S20). Therefore,  
208 we identify this central region as the necrotic core (Supplementary Discussion B). Experimental  
209 images at later times show that  $R_n(t)$ ,  $R_i(t)$  and  $R_p(t)$  continue to increase but at a much slower  
210 rate (Days 4-8 of Figure 4b,c). Throughout the experiment  $R_o(t)$  remains approximately constant  
211 (Days 2-8 of Figure 4b,c) confirming that the most important changes involve the internal structure  
212 and not the overall spheroid size. Further,  $\xi_n(t)$ ,  $\xi_i(t)$ , and  $\xi_p(t)$  approach values observed at late  
213 times for spheroids grown in hypoxia (Figure 4c, S25).

214 To interpret these deoxygenation experiments we extend Greenspan's mathematical model [10].  
215 We assume that the change in  $p_\infty$  at  $t_s$  is instantaneous, which is reasonable since the switch from  
216 normoxia to hypoxia requires only 1-2 minutes when the spheroids are transferred between incu-  
217 bators. This time is very short in comparison to the duration of the experiment and time interval  
218 between data points. Similarly, we assume that the oxygen partial pressure within the spheroid  
219 adapts to the change in  $p_\infty$  instantaneously, which is reasonable since oxygen takes approximately  
220 10 seconds to diffuse across a distance of 100  $\mu\text{m}$  [10]. Then we estimate the oxygen partial pressure  
221 within the spheroid at  $t_s$  under normoxic and hypoxic conditions (Methods 4.1.2, Figure 4d). Imme-  
222 diately after  $t_s$  the predicted necrotic radius, denoted  $R_n^+(t)$  and implicitly defined by  $p(R_n^+(t)) = 0$ ,  
223 is greater than the actual necrotic radius,  $R_n(t)$ , specifically  $R_n^+(t) > R_n(t)$  (Figure 4d-f).

224 Before considering the region  $R_n(t) < r < R_n^+(t)$ , recall that parameter estimates from spheroids  
225 grown in normoxia and hypoxia differ. Specifically,  $\alpha$  (Figure 3d),  $\lambda = \gamma s$  (Figure 3l,n),  $s$  (Figure 3l),  
226 and  $\mathcal{R}$  (Figure S23) are all different. Therefore, we expect that these parameter values will evolve



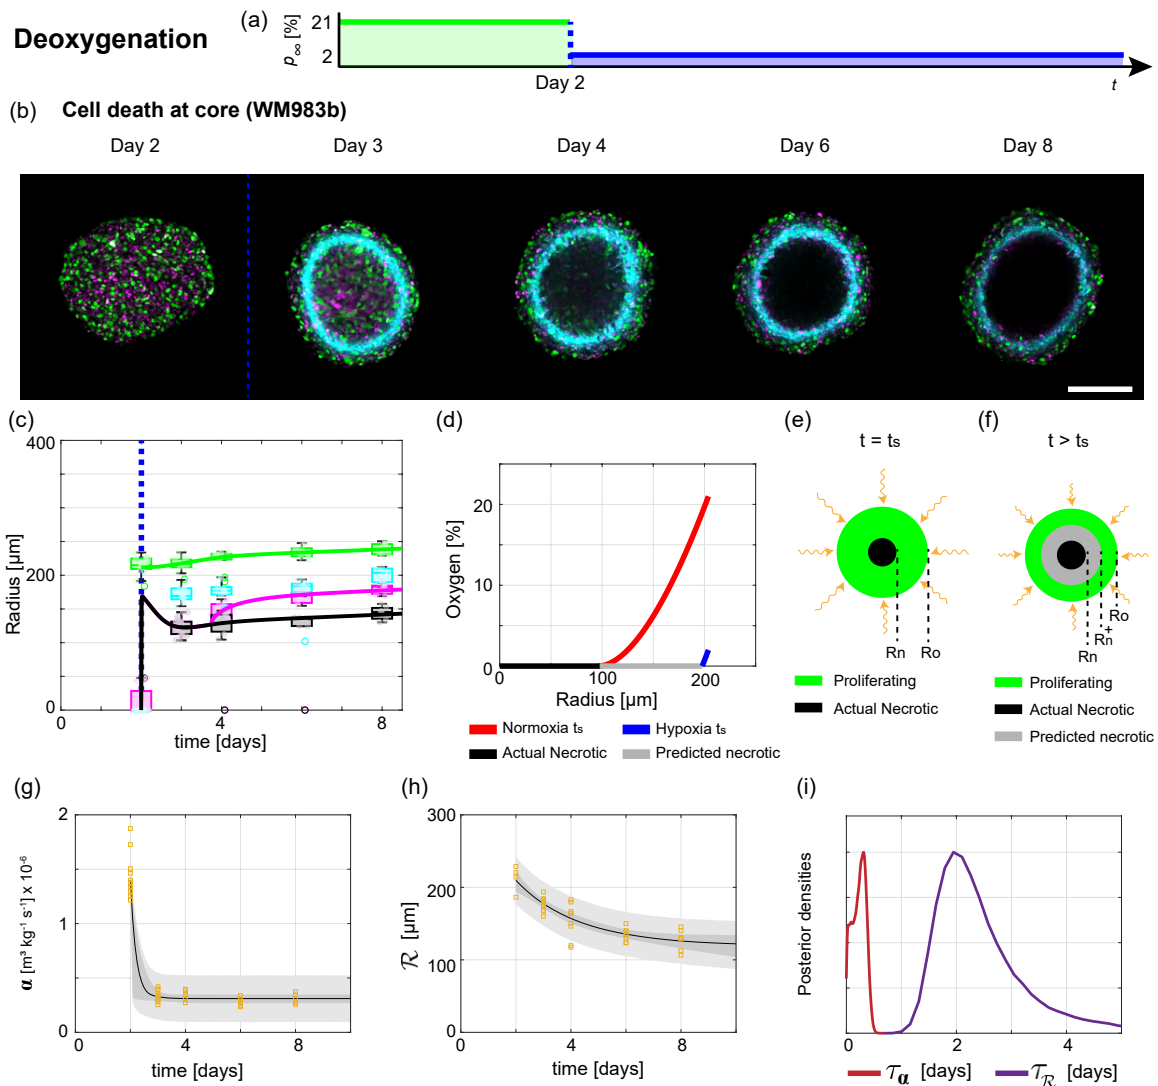

Figure 4: Analysis of deoxygenation experiments reveals tumour spheroid adaptation mechanisms. (a) Schematic for deoxygenation experiment, where the external oxygen environment switches from normoxia to hypoxia at  $t_s = 2$  [days]. (b) Experimental images of the equatorial plane of WM983b spheroids on Days 2, 3, 4, 6, and 8 after seeding. Scale bar is 200  $\mu\text{m}$ . Colours in (b) correspond to cell cycle schematic shown in Figure 2(c) and hypoxic regions are shown by pimonidazole staining (cyan). (c) Time evolution of outer radius  $R_o(t)$  (green), inhibited radius  $R_i(t)$  (magenta), hypoxic radius  $R_p(t)$  (cyan), and necrotic radius  $R_n(t)$  (black). Blue dashed lines in (b-c) indicate  $t_s$ . (d) Oxygen partial pressure within a spheroid estimated at  $t_s$  under normoxia (red) and hypoxia (blue). (e-f) Immediately after  $t_s$  the predicted necrotic radius,  $R_n^+(t_s)$ , is greater than the actual necrotic radius,  $R_n(t_s)$ . Cells in region  $R_n^+(t) < r < R_n(t)$  die and increase the volume of the necrotic core. (g) Estimates of  $\alpha(t)$  from experimental data compared to prediction intervals generated from the mathematical model. (h) Estimates of the outer radius when the inhibited region forms,  $\mathcal{R}$ , from experimental data compared to prediction intervals generated from the mathematical model. In (g-h) experimental data shown as orange squares, mathematical model simulated with the posterior means of the parameters (black), 50% posterior region of prediction interval (dark grey), and 97.5% posterior region of prediction interval (light grey). (i) Posterior density estimates for adaptation timescales  $\tau_\alpha$  (dashed) and  $\tau_{\mathcal{R}}$  (solid).



227 in time after  $t_s$ . To account for such changes we define the following, for  $t \geq t_s$ ,

$$\alpha(t) = \alpha_h + (\alpha_n - \alpha_h) \exp\left(-\frac{1}{\tau_\alpha}(t - t_s)\right), \quad (4.1)$$

$$\lambda(t) = \lambda_h + (\lambda_n - \lambda_h) \exp\left(-\frac{1}{\tau_\lambda}(t - t_s)\right), \quad (4.2)$$

$$s(t) = s_h + (s_n - s_h) \exp\left(-\frac{1}{\tau_s}(t - t_s)\right), \quad (4.3)$$

$$\mathcal{R}(t) = \mathcal{R}_h + (\mathcal{R}_n - \mathcal{R}_h) \exp\left(-\frac{1}{\tau_{\mathcal{R}}}(t - t_s)\right), \quad (4.4)$$

228 where  $\tau_\alpha$  [days],  $\tau_\lambda$  [days],  $\tau_s$  [days], and  $\tau_{\mathcal{R}}$  [days] denote timescales of adaptation for  $\alpha$ ,  $\lambda$ ,  $s$ , and  
 229  $\mathcal{R}$ , respectively. Further, the new constants in Equation (4) with subscripts  $n$  and  $h$ , for example  $\alpha_n$   
 230 and  $\alpha_h$ , represent parameter estimates from spheroids grown in normoxia and hypoxia, respectively.  
 231 The other parameters ( $k, \Omega, \kappa$ ), are assumed to be constants. Hence,  $R_c^2(t) = 6kp_\infty/(\alpha(t)\Omega)$  [ $\mu\text{m}^2$ ],  
 232  $Q^2(t) = \mathcal{R}^2(t)R_c^2(t)$  [-], and  $\gamma(t) = \lambda(t)/s(t)$  [-] are functions of time.

233 In the region  $R_n(t) < r < R_n^+(t)$  we assume cells die and increase the size of the necrotic core at  
 234 a rate  $\hat{\lambda}(t) = \hat{\lambda} \exp((t - t_s)/\tau_{\hat{\lambda}}) > 0$  [ $\text{day}^{-1}$ ] per unit volume (Figure 4f). Conservation of volume for  
 235 the necrotic core at time  $t$ ,  $V_n(t)$ , gives (Supplementary Discussion C.2.1)

$$\frac{dV_n(t)}{dt} = 3\hat{\lambda}(t) \left[ \frac{4\pi}{3} R_n^+(t)^3 - V_n(t) \right] - 3\lambda(t)V_n(t). \quad (5)$$

236 Volume is converted to radius for comparison with experimental data using  $R_n^3(t) = 3V_n(t)/4\pi$ . At  
 237 later times the term involving  $\hat{\lambda}(t)$  dominates the right hand side of Equation (5) and  $R_n(t)$  tends  
 238 to  $R_n^+(t)$ . Equation (1), obtained by conservation of volume arguments, remains valid by including  
 239 the time dependence in  $s(t)$  and  $\lambda(t)$ . At  $t_s$  there is no immediate change in the waste concentration  
 240 within the spheroid and so no immediate change to  $R_i(t)$ . However, as  $\mathcal{R}(t)$  changes with time  
 241 (Equation (4.4)) the waste concentration within the spheroid and  $R_i(t)$  evolve over time in part  
 242 directly due to deoxygenation.

243 In this new mathematical model (Equations (8.1)-(8.11)) there are fifteen parameters  $\Theta_d =$   
 244  $(R_o(0), \alpha_n, \alpha_h, \tau_\alpha, \mathcal{R}_n, \mathcal{R}_h, \tau_{\mathcal{R}}, s_n, s_h, \tau_s, \lambda_n, \lambda_h, \tau_\lambda, \hat{\lambda}, \tau_{\hat{\lambda}})$ . However, using Bayesian inference for  
 245 parameter estimation the biological adaptation mechanisms become clearer (Methods 4.2). First,  
 246 we identify fast adaptation to deoxygenation in  $\alpha(t)$  with  $\tau_\alpha = 0.26$  [days] (Figures 4g,h). Second,  
 247 we capture slower adaptation to deoxygenation for  $\mathcal{R}(t)$  with  $\tau_{\mathcal{R}} = 2$  [days] (Figures 4i,j). Third,  
 248 simulating the new deoxygenation mathematical model we find good agreement with the experimen-  
 249 tal measurements of  $R_o(t)$ ,  $R_n(t)$ , and  $R_i(t)$  (Figure 4c, S27). Therefore, our new mathematical  
 250 model provides a mechanistic description to the observed growth dynamics in the variable external  
 251 environment and appears to capture key adaptation mechanisms.

## 2.3 Adaptation to re-oxygenation

We also perform re-oxygenation experiments, where spheroids grown in normoxia are transferred to hypoxic conditions at time  $t_s$ . These re-oxygenation experiments exhibit a range of unexpected biological adaptation mechanisms for each cell line that appear to depend on:  $t_s$ ; spheroid size at re-oxygenation,  $R_o(t_s)$ ; and necrotic core fraction at re-oxygenation,  $\xi_n(t_s) = R_n(t_s)/R_o(t_s)$ .

First we focus on slower growing WM793b spheroids and  $t_s = 2$  [days] (Figure 5a,c). In hypoxic conditions prior to re-oxygenation, experimental images show a large hypoxic region (Day 2 of Figure 5a,c,g). However, after re-oxygenation at  $t_s + 1$  [days] there is no hypoxic region (Day 3 of Figure 5c,g). Spheroid growth after deoxygenation appears to progress similar to spheroids that are grown in normoxia throughout (Days 3-8 in Figure 5c,g).

For WM793b spheroids and  $t_s = 4$  [days], a necrotic core forms before  $t_s$  (Day 4 in Figure 5d,h). However, after deoxygenation, at  $t_s + 2$  [days] there is no necrotic core (Day 6 of Figure 5d,h). At  $t_s + 4$  [days] spheroids are either in phase (i) or phase (ii) (Day 8 of Figure 5d,h). While traditional tumour spheroid experiments progress through phase (i), (ii), and (iii) sequentially, these experiments show that spheroids can transition transiently through the growth phases in reverse order before subsequently growing in the usual order. Similar results are observed for WM164 spheroids. However, WM164 spheroids can also resume growth without losing their necrotic core (Figure S30). These different behaviours appear to be dependent on  $t_s$ ,  $R_o(t_s)$  and  $\xi_n(t_s)$ .

To interpret the WM793b and WM164 re-oxygenation experiments we proceed analogously to the deoxygenation experiments. We extend Greenspan's mathematical model to account for differences in parameter estimates between normoxia and hypoxia. Estimating the oxygen partial pressure within the spheroid at  $t_s$ , the predicted necrotic core, denoted  $R_n^+(t_s)$ , is smaller than the actual necrotic core,  $R_n(t_s)$ , provided  $R_n(t_s) > 0$ . In the region  $R_n^+(t) < r < R_n(t)$  where the necrotic core is now supplied with oxygen, we assume that size of the necrotic core decreases at a rate  $\tilde{\lambda}(t) = \tilde{\lambda} \exp((t - t_s)/\tau_{\tilde{\lambda}}) > 0$  [day<sup>-1</sup>] per unit volume. We assume that a fraction,  $0 \leq \nu \leq 1$ , of the volume lost from the necrotic core recovers from the harsh oxygen conditions and increases the population of living cells, and the remaining volume lost from the necrotic core diffuses out of the spheroid and does not influence  $R_i(t)$ . Using Bayesian inference we estimate the model parameters,  $\Theta_r = (R_o(0), \alpha_n, \alpha_h, \tau_\alpha, \mathcal{R}_n, \mathcal{R}_h, \tau_{\mathcal{R}}, s_n, s_h, \tau_s, \lambda_n, \lambda_h, \tau_\lambda, \tilde{\lambda}, \tau_{\tilde{\lambda}}, \nu)$  and simulate the mathematical model. We observe good agreement with the experimental data suggesting our new re-oxygenation mathematical model captures key mechanisms underlying adaptation and growth (Figures 5g,h, S29, S30).

Results for WM983b spheroids are unexpected. We hypothesised, based on the exploration of the mathematical model, that spheroid growth dynamics may occur in reverse as observed for WM793b and WM164 spheroids. However, we did not anticipate that WM983b spheroids would lose their symmetrical internal structure and necrotic core due to re-oxygenation (Figures 5i-n). The WM983b experiments are performed at four different re-oxygenation times  $t_s = 2, 2.5, 4$ , and  $5.5$  [days] (Figures

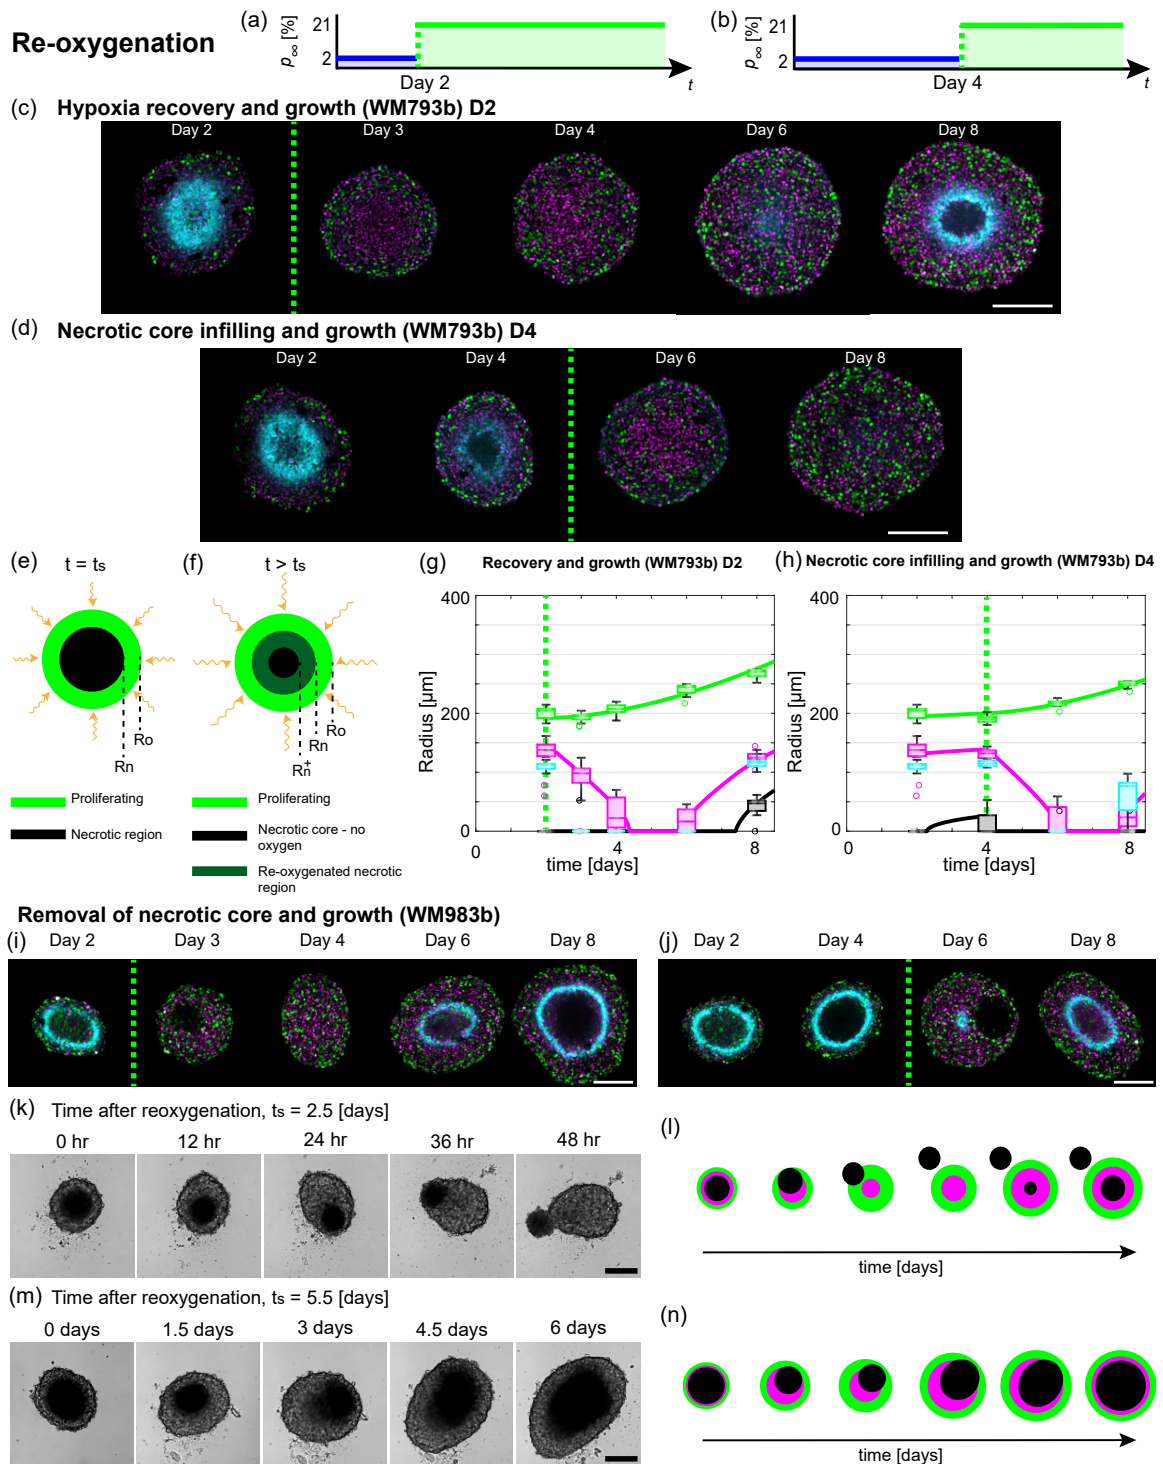

Figure 5: (Caption next page).

Figure 5: Tumour spheroids exhibit a range of adaption mechanisms in response to re-oxygenation. (a,b) Schematics for re-oxygenation experiments, where the external oxygen environment switches from hypoxia to normoxia at (a)  $t_s = 2$  [days], and, (b)  $t_s = 4$  [days]. (c,g) Hypoxia recovery and growth for WM793b cell line with  $t_s = 2$  [days] with (c) experimental images, and (g) radial measurements. (d,h) Necrotic core infilling and growth for WM793b cell line with  $t_s = 4$  [days] with (d) experimental images, and (h) radial measurements. Green dashed line in (c,d,g,h,i,j) indicate  $t_s$ . Colours in (g,h)  $R_o(t)$  (green),  $R_i(t)$  (magenta),  $R_n(t)$  (black), and  $R_p(t)$  (cyan). (e,f) Schematics for tumour spheroid structure due to re-oxygenation at  $t_s$ . (i-l) Removal of necrotic core and growth for WM983b cell line. (i) Confocal images for experiment with  $t_s = 2$  [days]. (j) Confocal images for experiment with  $t_s = 4$  [days]. (k) Bright-field images for experiment with  $t_s = 2.5$  [days]. (l) Schematic for removal of necrotic core and growth in WM983b cell line. (m) Bright-field images for experiment with  $t_s = 5.5$  [days]. (n) Schematic for movement of necrotic core and growth in WM983b cell line. Colours in (c,d,i,j) correspond to cell cycle schematic shown in Figure 2(c) and hypoxic regions are shown by pimonidazole staining (cyan). Scale bars in (c,d,i,j,k,m) are 200  $\mu\text{m}$ .

289 5i,j,k,m). For all experiments, spheroids at  $t_s$  prior to re-oxygenation are in phase (iii). For  $t_s = 2$ ,  
290 confocal microscopy reveals that at  $t_s + 1$  [days] there is a necrotic region but it is not at the centre  
291 of the spheroid (Day 3 of Figure 5i). At later times there is no necrotic region and growth proceeds  
292 analogous to spheroids in normoxia. Similarly, for  $t_s = 4$  (Figure 5j).

293 To explore this unusual behaviour for  $t_s = 2.5$  [days] and  $t_s = 5.5$  [days] we perform experiments  
294 using the IncuCyte S3 live cell imaging system (Sartorius, Goettingen, Germany) and obtain hourly  
295 bright-field images after re-oxygenation. In Figure 5k with  $t_s = 2.5$  [days], initially the necrotic core  
296 of the spheroid is visible as a dark central region. At later times the necrotic core is located closer  
297 to the edge of the spheroid and the radially symmetric internal structure is lost (12, 24 and 36 hours  
298 after re-oxygenation in Figure 5k). At  $t_s + 2$  [days] the necrotic core appears to have exited the  
299 spheroid as a single object (48 hours after re-oxygenation in Figure 5k). Tracking the position of  
300 the necrotic core relative to the spheroid suggests the necrotic core moves randomly (Supplementary  
301 Discussion D.3.1).

302 We observe similar behaviour for WM983b spheroids with  $t_s = 5.5$  [days]. However, likely due to  
303 the larger  $R_o(t_s)$  and  $\xi_n(t_s)$  here, the necrotic core is close to the edge of the spheroid but does not  
304 exit as a single object (1.5 and 3 days after  $t_s$  in Figure 5). Instead as the spheroid grows necrotic  
305 matter forms at the centre of the spheroid and appears to merge with the necrotic matter located  
306 closer to the periphery (3, 4.5 and 6 days after  $t_s$  in Figure 5). As the WM983b spheroids do not  
307 maintain spherical symmetry we do not interpret these experimental data with the re-oxygenation  
308 mathematical model. Schematics describing the behaviours are presented in Figure 5l,n.

### 309 **3 Discussion**

310 Tumours grow in complicated fluctuating external environments. However, spheroid experiments  
311 used to study tumours are typically performed in constant external environments and with oxygen  
312 partial pressures that are much greater than *in vivo*. To explore this gap between *in vitro* and *in*  
313 *vivo* conditions, we analyse a series of tumour spheroid experiments using mathematical modelling  
314 and statistical uncertainty quantification. Growing spheroids in time-dependent external oxygen  
315 conditions reveals a range of behaviours not observed in standard experimental protocols. For fifty  
316 years, tumour spheroid growth has been characterised by three sequential growth phases: phase  
317 (i) exponential growth; phase (ii) reduced exponential growth; and phase (iii) saturation. How-  
318 ever, here in re-oxygenation experiments, spheroids can transiently undergo these growth phases in  
319 reverse. Furthermore, spheroids can lose their spherically symmetric structure and necrotic core.  
320 Deoxygenation experiments also show that large changes to the internal structure of spheroids can  
321 occur while the overall size remains constant. Overall, our results suggest that oxygen and internal  
322 structure play pivotal roles in spheroid growth and should be taken into account when interpreting  
323 spheroid experiments. This is important as many studies do not provide sufficient information to  
324 replicate oxygen conditions and do not measure spheroid internal structures.

325 Tumour spheroid growth is a complex process involving multiple mechanisms. However, the  
326 contribution of each mechanism to growth is unclear using experimentation alone. To quantitatively  
327 explore which mechanisms contribute to spheroid growth we use the seminal Greenspan mathematical  
328 model [10]. The model describes the growth of spheroids in normoxia and hypoxia remarkably  
329 well. Moreover, our analysis suggests that growth and formation of the necrotic core is reasonably  
330 described by oxygen diffusion and consumption, whereas the growth and formation of the inhibited  
331 region is more accurately described by waste production and diffusion. Using statistical uncertainty  
332 quantification we show that the rates at which different biological processes occur differ between  
333 normoxia and hypoxia. Therefore, external environmental conditions should be taken into account  
334 when interpreting tumour spheroid experiments. Previous studies analysing previously available  
335 experimental data with Greenspan's model [15, 16] have not been able to distinguish between the  
336 two mechanisms. Further, our results build on studies analysing spheroid snapshots only [17, 35].  
337 As the model captures the key dynamics, we do not include other biological mechanisms that may  
338 be relevant in future studies, for example glucose [4]. Introducing additional mechanisms prior to  
339 developing the deoxygenation and re-oxygenation models would complicate the analysis, and likely  
340 result in parameters being non-identifiable and not physically interpretable. Both of which we aim  
341 to avoid. Many mathematical models have been developed with additional mechanisms, but they  
342 have not been quantitatively tested with experimental data [25, 31–34]. The experimental data and  
343 framework that we provide here are suitable to test such models.

344 Deoxygenation and re-oxygenation experiments reveal how spheroid overall size and internal  
345 structure adapt to changes in the external environment. However, without a mathematical mod-

346 elling and statistical uncertainty quantification framework like we use here, the mechanisms underlying  
347 ing adaptation are challenging to identify and interpret. Extending Greenspan's mathematical model  
348 allows us to interpret, analyse, and describe these deoxygenation and re-oxygenation experiments re-  
349 markably well. Parameter estimation and identifiability analysis, using profile likelihood analysis and  
350 Bayesian inference, allows us to identify and quantify the contributions of key biological mechanisms  
351 to adaptation and growth. For both models, the analysis identifies a narrow range of behaviours that  
352 differ in terms of the rates of adaptation in  $t_s < t < t_s + 1$  [days] and long term dynamics (Supple-  
353 mentary Discussion D.2.1). These modelling predictions raise interesting questions (Supplementary  
354 Discussion D.2.1). In comparison to standard experimental protocols, we collect more data per time  
355 point and over a longer duration. Further, we build on previous studies [13, 15, 16] to improve on  
356 standard experimental designs by measuring the internal structure of spheroids and hypoxic regions  
357 in addition to the overall size. Even these improvements to standard protocols are insufficient to  
358 identify all adaptation processes. As with all studies, additional data would be beneficial. In partic-  
359 ular, frequent measurements of oxygen and internal structure at early times would be useful but are  
360 challenging to obtain experimentally (Supplementary Discussion D.2).

361 Re-oxygenation experiments reveal unexpected necrotic core removal in WM983b spheroids. To  
362 the best of our knowledge this behaviour has not been previously described. The exact mechanisms  
363 underlying this behaviour are unclear. We hypothesise that small asymmetry at re-oxygenation,  
364 possibly in the distribution of proliferating cells, in combination with changes to cell-cell adhesion  
365 and physical interactions contribute. As spheroids formed from other cell lines have more liquid-like  
366 necrotic cores than the WM983b spheroids at re-oxygenation, it is unclear whether these observations  
367 are relevant to other cell lines. Interesting future work is to explore these unusual behaviours in  
368 greater detail. For example, can this phenomenon be induced by other external environmental  
369 changes, drug treatments, and *in vivo*.

370 This work lays the foundation for further studies bridging the gap between clinical conditions  
371 and standard experimental protocols. Here, we consider normoxia and hypoxia and switches between  
372 normoxia and hypoxia. Other oxygen conditions are also worth consideration, for example to mimic  
373 *in vivo* oxygen gradients [39], *in vivo* vascularisation, disrupted oxygen supplies, or cyclic hypoxia [1].  
374 Microfluidic devices may be one useful approach [25], but challenges visualising the internal structure  
375 of spheroids throughout such experiments must be overcome. Intracellular responses to oxygen  
376 changes are also of interest [40, 41]. While we focus here on the impact of changing the oxygen  
377 conditions, our framework is well suited to explore the role of other changing external conditions on  
378 spheroid growth, for example nutrient availability and mechanical confinement [4, 11]. Further, the  
379 framework can be extended to explore different treatment strategies, for example radiotherapy and  
380 chemotherapy [31, 42].



## 4 Methods

### 4.1 Mathematical modelling

#### 4.1.1 Greenspan's mathematical model

Key elements of Greenspan's mathematical model for fixed  $p_\infty$  are included in the main text. Further details of the model derivation are included in Supplementary Discussion C.1. Recall that this model has two interpretations, that we refer to as hypotheses 1 and 2.

- Hypothesis 1 assumes that the necrotic and inhibited regions are both driven by oxygen diffusion and consumption.
- Hypothesis 2 assumes that the necrotic region is driven by oxygen diffusion and consumption whereas the inhibited region is driven by waste production and diffusion.

Here, we present the governing differential-algebraic system of equations for the outer radius,  $R_o(t)$ , necrotic radius,  $R_n(t)$ , and inhibited radius,  $R_i(t)$ , for both hypotheses 1 and 2,

$$R_o^2(t) \frac{dR_o(t)}{dt} = \frac{s}{3} [R_o^3(t) - \max(R_i(t)^3, R_n^3(t))] - \lambda R_n(t)^3, \quad (6.1)$$

$$R_c^2 = R_o^2(t) - R_n^2(t) - \frac{2R_n^2(t)}{R_o(t)} (R_o(t) - R_n(t)), \quad (6.2)$$

$$\mathcal{R}^2 = R_o^2(t) - R_i^2(t) - 2R_n^3(t) \left( \frac{1}{R_i(t)} - \frac{1}{R_o(t)} \right). \quad (6.3)$$

In these experiments, Equation (6.1) simplifies as  $R_i(t) \geq R_n(t)$ , consistent with our parameter choices (Methods 4.2) [16]. For both hypothesis 1 and 2: the outer radius when the necrotic region forms is  $R_c = [6kp_\infty/(\alpha\Omega)]^{1/2}$ ; Equation (6.1) arises from conservation of volume; and, Equation (6.2) is obtained by evaluating the oxygen partial pressure within the spheroid at the necrotic threshold. For hypothesis 1, Equation (6.3) is obtained by evaluating the oxygen partial pressure within the spheroid at the oxygen inhibited threshold,  $p_i$ , and  $Q^2 = (p_\infty - p_i)/p_\infty$  so the left hand side of Equation (6.3) is  $\mathcal{R}^2 = R_c^2 Q^2 = 6k(p_\infty - p_i)/(\alpha\Omega)$ . In contrast, for hypothesis 2, Equation (6.3) arises by evaluating the waste concentration within the spheroid at the waste inhibited threshold,  $\beta_i$ , and  $Q^2 = \beta_i \kappa \alpha \Omega / (Pk p_\infty)$  so the left hand side of Equation (6.3) is  $\mathcal{R}^2 = R_c^2 Q^2 = 6\beta_i/P$ . We solve the system of Equations (6.1)-(6.3) numerically using MATLAB's `ode15s` function.

Analysing the model, the inhibited region forms at [10]

$$t = \frac{3}{s} \log \left( \frac{\mathcal{R}}{R_o(0)} \right). \quad (7.1)$$

For hypothesis 1, Equation (7.1) is  $t = (3/s) \log ([6k(p_\infty - p_i)/\alpha]^{1/2}/R_o(0))$ . For hypothesis, 2 Equation (7.1) is  $t = (3/s) \log ([6\beta_i \kappa/P]^{1/2}/R_o(0))$ .

#### 4.1.2 Mathematical model to interpret deoxygenation experiments

Key elements of the mathematical model derived to interpret deoxygenation experiments are included in the main text. Further details of the model derivation are included in Supplementary Discussion C.2. Here, we present the governing equations for  $0 < t < t_s$  and  $t > t_s$ .

For  $0 < t < t_s$  we solve Greenspan's mathematical model [10] in normoxia interpreting the governing mechanisms with hypothesis 2. The differential-algebraic system of Equations (6.1)-(6.3) are solved to determine  $R_o(t)$ ,  $R_n(t)$ , and  $R_i(t)$ .

After deoxygenation,  $t > t_s$ , we extend Greenspan's mathematical model to account for adaptation to hypoxia. Rewriting Equations (4), (5), (6.1), and solving Equation (6.2) for  $R_n^+(t)$  instead of  $R_n(t)$ , gives the governing differential-algebraic system of equations

$$R_o^2(t) \frac{dR_o(t)}{dt} = \frac{s(t)}{3} [R_o^3(t) - \max(R_i^3(t), R_n^3(t))] - \lambda(t) R_n^3(t), \quad (8.1)$$

$$\frac{dV_n(t)}{dt} = 3\hat{\lambda}(t) \left[ \frac{4\pi}{3} R_n^+(t)^3 - V_n(t) \right] - 3\lambda(t) V_n(t), \quad (8.2)$$

$$R_c^2(t) = R_o^2(t) - R_n^+(t)^2 - \frac{2R_n^+(t)^2}{R_o(t)} (R_o(t) - R_n^+(t)), \quad (8.3)$$

$$\mathcal{R}^2(t) = R_o^2(t) - R_i^2(t) - 2R_n^3(t) \left( \frac{1}{R_i(t)} - \frac{1}{R_o(t)} \right), \quad (8.4)$$

$$\alpha(t) = \alpha_h + (\alpha_n - \alpha_h) \exp\left(-\frac{1}{\tau_\alpha} (t - t_s)\right), \quad (8.5)$$

$$\lambda(t) = \lambda_h + (\lambda_n - \lambda_h) \exp\left(-\frac{1}{\tau_\lambda} (t - t_s)\right), \quad (8.6)$$

$$s(t) = s_h + (s_n - s_h) \exp\left(-\frac{1}{\tau_s} (t - t_s)\right), \quad (8.7)$$

$$\mathcal{R}(t) = \mathcal{R}_h + (\mathcal{R}_n - \mathcal{R}_h) \exp\left(-\frac{1}{\tau_{\mathcal{R}}} (t - t_s)\right), \quad (8.8)$$

$$\hat{\lambda}(t) = \hat{\lambda} \exp\left(\frac{1}{\tau_{\hat{\lambda}}} (t - t_s)\right), \quad (8.9)$$

$$R_n(t) = \left[ \frac{3}{4\pi} V_n(t) \right]^{\frac{1}{3}}, \quad (8.10)$$

$$R_c^2(t) = \frac{6kp_\infty}{\alpha(t)\Omega}. \quad (8.11)$$

Note that in the long time limit  $t \rightarrow \infty$ , we recover Greenspan's mathematical model for normoxia (Equations (6.1)-(6.3)). Specifically,  $\alpha(t) \rightarrow \alpha_h$ ,  $\lambda(t) \rightarrow \lambda_h$ ,  $s(t) \rightarrow s_h$  and  $\mathcal{R}(t) \rightarrow \mathcal{R}_h$  as  $t \rightarrow \infty$ . Further, the term involving  $\hat{\lambda}(t)$  dominates the right hand side of Equation (8.2) as  $t \rightarrow \infty$ , so  $R_n(t) \rightarrow R_n^+(t)$  as  $t \rightarrow \infty$ . We solve the system of equations (8.1)-(8.11) numerically using MATLAB's `ode15s` function.

#### 4.1.3 Mathematical model to interpret re-oxygenation experiments

Key details of the mathematical model to interpret re-oxygenation experiments are included in Supplementary Discussion C.3.



## 424 4.2 Parameter estimation and identifiability analysis

425 Parameter estimation and identifiability analysis is performed using profile likelihood analysis [15,16,  
426 43,44], Bayesian inference [45–47], and global optimisation techniques, as now detailed. Throughout  
427 we exclude outliers in the experimental data. To detect outliers for each experiment we analyse  
428 each measurement type,  $R_o(t)$ ,  $R_n(t)$ , and  $R_i(t)$  at each time point independently using MATLABs  
429 `isoutlier` function with method `quartiles`.

### 430 4.2.1 Greenspan’s model

431 Parameter estimation and identifiability analysis for Greenspan’s model is first performed using pro-  
432 file likelihood analysis (Figure 3), see [16]. The Bayesian inference approach to estimate parameters  
433 of Greenspan’s model is discussed in the following.

### 434 4.2.2 Deoxygenation experiments

435 Parameter estimation for the deoxygenation model (Equations (8.1)-(8.11)) is performed using global  
436 optimisation and Bayesian inference techniques. We now explain how we estimate the fifteen model  
437 parameters,  $\Theta_d = (R_o(0), \alpha_n, \alpha_h, \tau_\alpha, \mathcal{R}_n, \mathcal{R}_h, \tau_{\mathcal{R}}, s_n, s_h, \tau_s, \lambda_n, \lambda_h, \tau_\lambda, \hat{\lambda}, \tau_{\hat{\lambda}})$ . Informed  
438 by experimental measurements we set  $R_n(t_s) = 0$  and  $R_i(t_s) = 0$ , but they could be included as  
439 additional parameters in future work.

440 We revisit Greenspan’s mathematical model for spheroids grown in normoxia and hypoxia for  
441 first estimates of  $s_n$ ,  $s_h$ ,  $\lambda_n$  and  $\lambda_h$ . Starting with data from spheroids grown in normoxia, we fit a  
442 normal distribution to the initial outer radius measurements using the MATLAB `fitdist` function.  
443 Then for each spheroid we estimate  $R_c$  using Equation (6.2) given measurements of  $R_o(t)$  and  $R_n(t)$   
444 and fit a normal distribution using the MATLAB `fitdist` function. Similarly, we estimate  $\mathcal{R}$  using  
445 Equation (6.3) and measurements of  $R_o(t)$ ,  $R_n(t)$  and  $R_i(t)$  and fit a normal distribution using  
446 the MATLAB `fitdist` function. Next, we seek to estimate the five parameters of Greenspan’s  
447 model,  $\Theta_n = (R_o(0), R_c, s, \lambda, \mathcal{R})$ , using the MATLAB package `MCMCstat` developed by Marko  
448 Laine [48,49]. Detailed information on the `MCMCstat` package is available on the GitHub repository  
449 (<https://mjlane.github.io/mcmcstat/>).

450 Before we can use the `MCMCstat` package we require good first estimates of  $\Theta_n$  and the mean  
451 squared error, *mse*. To provide a good first estimate for  $\Theta_n$ , we perform global optimisation using the  
452 MATLAB `GlobalSearch` function with settings: `fmincon sqp` algorithm; `MaxTime` = 15 [minutes];  
453 `NumTrialPoints` = 5000; and `lowerbounds` and `upperbounds` informed by fitted normal distributions  
454 for  $R_o(0)$ ,  $R_c$ , and  $\mathcal{R}$  and previous results [16]. To estimate the *mse* we use experimental measure-  
455 ments as observations and simulate the deoxygenation model with the estimate of  $\Theta_n$  from global  
456 optimisation to obtain predicted values. Next we use the `MCMCstat` package to generate MCMC  
457 chains with 100,000 samples and enable automatic sampling and estimation of the error standard  
458 deviation. For other `MCMCstat` package options we use the default settings. Performing posterior

459 checks, using 25,000 samples from the chain to generate prediction intervals and comparing with the  
460 experimental data, suggests the parameter estimates are reasonable. This process is repeated for the  
461 hypoxia data to estimate  $\Theta_h$ . The posteriors generated here are for  $s_n$ ,  $s_h$ ,  $\lambda_n$  and  $\lambda_h$ .

462 Next, we analyse the deoxygenation experimental data at each spheroid and time point indepen-  
463 dently. To estimate  $\mathcal{R}_n$ ,  $\mathcal{R}_h$ ,  $\tau_{\mathcal{R}}$  from Equation (8.8) we use global minimisation and the *MCMCstat*  
464 package. For measurements of  $\mathcal{R}$  for each spheroid and at each time point independently we use  
465 Equation (6.2) and measurements of  $R_o(t)$  and  $R_n(t)$ . Similarly, to estimate  $\alpha_n$ ,  $\alpha_h$ ,  $\tau_\alpha$  from Equa-  
466 tion (8.5) we use global minimisation and the *MCMCstat* package. For measurements of  $\alpha$  we use  
467 Equations (8.11) and (6.3) and measurements of  $R_o(t)$ ,  $R_n(t)$  and  $R_i(t)$ . Note that to estimate  $R_c$   
468 we assume that  $R_n(t) = R_n^+(t)$ . To estimate  $R_o(0)$  we fit a normal distribution using the MATLAB  
469 `fitdist` function to measurements of  $R_o(t)$  at the first time point.

470 Next we perform a global minimisation to estimate  $\Theta_d$ , using the estimates of  $R_o(0)$ ,  $\alpha_n$ ,  $\alpha_h$ ,  
471  $\tau_\alpha$ ,  $\mathcal{R}_n$ ,  $\mathcal{R}_h$ ,  $\tau_{\mathcal{R}}$ ,  $s_n$ ,  $s_h$ ,  $\lambda_n$ ,  $\lambda_h$  to inform *lowerbounds* and *upperbounds*. Using the estimate of  $\Theta_d$   
472 from global minimisation as a first guess, we then use the *MCMCstat* package to generate MCMC  
473 chains with 200,000 samples and enable automatic sampling and estimation of the error variance.  
474 Performing posterior checks, using 50,000 samples from the chain to generate prediction intervals  
475 and comparing with the experimental data, suggests the parameter estimates are reasonable.

#### 476 4.2.3 Re-oxygenation experiments

477 Parameter estimation for the re-oxygenation model formed by Equations (S.34.1)-(S.34.10), with  
478 parameters  $\Theta_r = (R_o(0), \alpha_n, \alpha_h, \tau_\alpha, \mathcal{R}_n, \mathcal{R}_h, \tau_{\mathcal{R}}, s_n, s_h, \tau_s, \lambda_n, \lambda_h, \tau_\lambda, \tilde{\lambda}, \tau_{\tilde{\lambda}}, \nu)$ , is analogous to  
479 the approach used for the deoxygenation model.

### 480 4.3 Experimental methods

481 *Cell culture.* The human melanoma cell lines established from primary (WM793b) and metastatic  
482 cancer sites (WM983b, WM164) were provided by Prof. Meenhard Herlyn, The Wistar Institute,  
483 Philadelphia, PA, [50]. All cell lines were previously transduced with fluorescent ubiquitination-  
484 based cell cycle indicator (FUCCI) constructs [13, 14]. Cell lines were previously genotypically  
485 characterised [13, 51–53], and authenticated by short tandem repeat fingerprinting (QIMR Berghofer  
486 Medical Research Institute, Herston, Australia). The cells were cultured in melanoma cell medium  
487 (“Tu4% medium”): 80% MCDB-153 medium (Sigma-Aldrich, M7403), 20% L-15 medium (Sigma-  
488 Aldrich, L1518), 4% fetal bovine serum (ThermoFisher Scientific, 25080-094), 5 mg mL<sup>-1</sup> insulin  
489 (Sigma-Aldrich, I0516), 1.68 mM CaCl<sub>2</sub> (Sigma-Aldrich, 5670) [14]. Cell lines were checked routinely  
490 for mycoplasma and tested negative using the MycoAlert MycoPlasma Detection Kit (Lonza) and  
491 polymerase chain reaction [54].

492 *Spheroid generation, culture, and experiments.* Spheroids were generated in 96-well cell culture  
493 flat-bottomed plates (3599, Corning), with 5000 total cells/well, using 50 µL total/well non-adherent  
494 1.5% agarose to promote formation of a single spheroid per well [30]. From previous work we  
495 expect that different seeding densities, in the range 1250-10000 total cells/well, will provide similar  
496 results [15, 16]. For all experiments spheroids formed after 2 days for WM793b, WM164 and WM983b.  
497 On day 3 and 7 of each experiment 50% of the medium in each well was replaced with fresh medium  
498 (200 µL total/well). Each experiment was performed for 8 days, informed by previous experiments  
499 with these cell lines so that necrotic and inhibited region form prior to the end of the experiments [16].

500 For normoxia experiments, cells and spheroids were grown and formed in an incubator with  
501 standard settings: 37 °C, 5% CO<sub>2</sub> [13, 14]; referred to as the normoxia incubator. For hypoxia exper-  
502 iments, cells were cultured in the normoxia incubator and then spheroids were grown in a hypoxia  
503 incubator with settings: 37 °C, 5% CO<sub>2</sub>, 2% O<sub>2</sub>. For deoxygenation experiments, cells and spheroids  
504 were formed and grown in the normoxia incubator. At the time of deoxygenation, the relevant  
505 plate(s) of spheroids were manually transferred from the normoxia incubator to the hypoxia incu-  
506 bator. Similarly, for the re-oxygenation experiments spheroids were grown in the hypoxia incubator  
507 then at the time of re-oxygenation the relevant plate(s) of spheroids were manually transferred to  
508 the normoxia incubator. The time to move plates was 1-2 minutes.

509 To estimate the outer, necrotic, inhibited, and hypoxic radii, we use a high-throughput method of  
510 mounting, clearing and imaging [55]. Spheroids maintained in the relevant incubator were harvested,  
511 fixed with 4% paraformaldehyde (PFA), and stored in phosphate buffered saline solution (PBS),  
512 sodium azide (0.02%), Tween-20 (0.1%), and DAPI (1:2500) at 4 °C, on days 2, 3, 4, 6 and 8  
513 after seeding. For hypoxia measurements, spheroids were stained with 100mM pimonidazole for  
514 three hours, prior to fixation. Spheroids were then permeabilized with 0.5% Triton X-100 in PBS  
515 for one hour; blocked in antibody dilution buffer (Abdil) [56] for 24 hours; stained with a 1:50  
516 anti-pimonidazole mouse IgG1 monoclonal antibody (Hypoxyprobe-1 MAb1) in Abdil for 48 hours;

517 washed in PBS with 0.1% Tween-20 for 6 hours; placed in a 1:100 solution of goat anti-mouse Alexa  
518 Flour 647 in Abdil for 48 hours; and, finally washed for 6 hours in PBS. Then for imaging, fixed  
519 spheroids were set in place using low melting 2% agarose and optically cleared in 500  $\mu$ L total/well  
520 high refractive index mounting solution (Quadrol 9 % wt/wt, Urea 22 % wt/wt, Sucrose 44 % wt/wt,  
521 Triton X-100 0.1 % wt/wt, water) for 2 days in a 24-well glass bottom plate (Cellvis, P24-1.5H-N)  
522 before imaging to ensure accurate measurements [55, 57, 58]. Images were then captured using an  
523 Olympus FV3000 confocal microscope with the 10 $\times$  objective focused on the equatorial plane of  
524 each spheroid.

525 As the unexpected necrotic core movement for WM983b cell line was observed in the re-oxygenation  
526 experiments, the re-oxygenation experiments were repeated for all cell lines alongside a control nor-  
527 moxia condition. Spheroids were cultured into three 96-well plates (3599, Corning): plate (i) control  
528 for normoxia; plate (ii) re-oxygenation 2.5 days after seeding; and, plate (iii) re-oxygenation 5.5 days  
529 after seeding. Each plate consisted of 32 spheroids of each cell line. The plates were placed inside the  
530 IncuCyte S3 live cell imaging system (Sartorius, Goettingen, Germany) incubator (37  $^{\circ}$ C, 5% CO<sub>2</sub>).  
531 IncuCyte S3 settings were chosen to image with the 4 $\times$  objective. For plate (i) images were captured  
532 every 2 hours for the first three days and then every 4 hours for the remainder of the experiment.  
533 For plate (ii) and (iii) images were captured every hour for three and seven days, respectively.

534 *Image processing.* Confocal microscopy images were converted to TIFF files in ImageJ and then  
535 processed with custom MATLAB scripts that use standard MATLAB image processing toolbox  
536 functions. Area was converted to an equivalent radius ( $r^2 = A/\pi$ ). These scripts are freely available  
537 on Zenodo with DOI:10.5281/zenodo.5121093 [59], with modifications to account for pimonidazole  
538 staining and blurred central regions due to hypoxia and deoxygenation discussed in Supplementary  
539 Discussion B. Images captured with the IncuCyte S3 were processed with custom MATLAB scripts  
540 that use standard MATLAB image processing toolbox functions and are detailed in Supplementary  
541 Discussion D.3.1.

542 *Statistics and Reproducibility.* Details of practical parameter identifiability analysis and the  
543 Bayesian inference are presented in Section 4.2. Each radial measurements is represented as an  
544 individual data point in relevant figures, with non-filled circles representing outliers (Section 4.2),  
545 and are summarised using box charts. Supplementary Table S1 details the number of measurements  
546 at each time point for each cell line and experimental data analysed during the study are available on  
547 a GitHub repository (<https://github.com/ryanmurphy42/Murphy2022SpheroidOxygenAdaptation>).  
548 We note that some measurements could not be obtained primarily due to blurring of the automated  
549 imaging, spheroids not forming properly, or spheroids losing their structural integrity at late times.  
550 Data for these spheroids was excluded. In a previous study we assess experimental designs [16] and  
551 use this to inform that our sample size is sufficient in this study. Randomisation and blinding was  
552 not possible.

### 553 **Data Availability**

554 The datasets generated during and analysed during the current study are available on a GitHub repos-  
555 itory (<https://github.com/ryanmurphy42/Murphy2022SpheroidOxygenAdaptation>) and are summarised  
556 in the electronic supplementary material.

### 557 **Code Availability**

558 Key computer code and all experimental data used to generate computational results are available on  
559 a GitHub repository (<https://github.com/ryanmurphy42/Murphy2022SpheroidOxygenAdaptation>)  
560 repository. The computer code for the mathematical modelling and statistical identifiability anal-  
561 ysis was written in MATLAB R2021b (v9.11) with the Image Processing Toolbox (v11.4), Op-  
562 timization Toolbox (v9.2), Global Optimization Toolbox (v4.6), and the Statistics and Machine  
563 Learning Toolbox (v12.2), and uses the *MCMCstat* package available on the GitHub repository  
564 (<https://mjlane.github.io/mcmcstat/>).

### 565 **Author Contributions**

566 All authors conceived and designed the study. R.J.M. performed the research and drafted the article.  
567 G.G. and R.J.M. performed experimental work. All authors provided comments and approved the  
568 final version of the manuscript. N.K.H. and M.J.S. contributed equally.

### 569 **Competing Interests**

570 The authors declare no competing interests.

### 571 **Funding**

572 M.J.S. and N.K.H. are supported by the Australian Research Council (DP200100177). R.J.M. is  
573 supported by the QUT Centre for Data Science.

### 574 **Acknowledgements**

575 We thank Dr Alexander P. Browning and Dr Patrick B. Thomas for helpful discussions, and John  
576 Blake for guidance using IncuCyte. This research was carried out at the Translational Research  
577 Institute (TRI), Woolloongabba, QLD. TRI is supported by a grant from the Australian Government.  
578 We thank the staff in the microscopy core facility at TRI for their technical support. We thank Prof.  
579 Atsushi Miyawaki, RIKEN, Wako-city, Japan, for providing the FUCCI constructs, Prof. Meenhard  
580 Herlyn, The Wistar Institute, Philadelphia, PA, for providing the cell lines.

## References

- 581
- [1] Bader, S. B., Dewhirst, M. W. & Hammond, E. M. Cyclic hypoxia: An update on its characteristics, methods to measure it and biological implications in cancer. *Cancers* **13**, 23 (2021).  
582  
583
- [2] Kumar, B. *et al.* Tumor collection/processing under physioxia uncovers highly relevant signaling networks and drug sensitivity. *Science Advances* **8**, eabh3375 (2022).  
584  
585
- [3] Vaupel, P., Kallinowski, F. & Okunieff, P. Blood flow, oxygen and nutrient supply and metabolic environment of human tumours: A review. *Cancer Research* **49**, 6449–6465 (1989).  
586  
587
- [4] Mueller-Klieser, W., Freyer, J. & Sutherland, R. Influence of glucose and oxygen supply conditions on the oxygenation of multicellular spheroids. *British Journal of Cancer* **53**, 345–353 (1986).  
588  
589  
590
- [5] Hirschhaeuser, F. *et al.* Multicellular tumor spheroids: An underestimated tool is catching up again. *Journal of Biotechnology* **148**, 3–15 (2010).  
591  
592
- [6] Costa, E. C. *et al.* 3D tumor spheroids: an overview on the tools and techniques used for their analysis. *Biotechnology Advances* **34**, 1427–1441 (2016).  
593  
594
- [7] Nath, S. & Devi, G. R. Three-dimensional culture systems in cancer research: Focus on tumor spheroid model. *Pharmacology & Therapeutics* **163**, 94–108 (2016).  
595  
596
- [8] Mehta, G., Hsiao, A. Y., Ingram, M., Luker, G. D. & Takayama, S. Opportunities and challenges for use of tumor spheroids as models to test drug delivery and efficacy. *Journal of Controlled Release* **10**, 192–204 (2012).  
597  
598  
599
- [9] Weiswald, L., Bellet, D. & Dangles-Marie, V. Spherical cancer models in tumor biology. *Neoplasia* **17**, 1–15 (2015).  
600  
601
- [10] Greenspan, H. P. Models for the growth of a solid tumor by diffusion. *Studies in Applied Mathematics* **51**, 317–340 (1972).  
602  
603
- [11] Le Maout, V. *et al.* Role of mechanical cues and hypoxia on the growth of tumor cells in strong and weak confinement a dual in vitro in silico approach. *Science Advances* **6**, eaaz7130 (2020).  
604  
605
- [12] Beaumont, K. A., Mohana-Kumaran, N. & Haass, N. K. Modeling melanoma in vitro and in vivo. *Healthcare* **2**, 27–46 (2014).  
606  
607
- [13] Haass, N. K. *et al.* Real-time cell cycle imaging during melanoma growth, invasion, and drug response. *Pigment Cell & Melanoma Research* **27**, 764–776 (2014).  
608  
609
- [14] Spoerri, L., Beaumont, K. A., Anfosso, A. & Haass, N. K. Real-time cell cycle imaging in a 3D cell culture model of melanoma. *Methods in Molecular Biology* **1612**, 401–416 (2017).  
610  
611

- 612 [15] Browning, A. P. *et al.* Quantitative analysis of tumour spheroid structure. *eLife* **10**, e73020  
613 (2021).
- 614 [16] Murphy, R. J., Browning, A. P., Gunasingh, G., Haass, N. K. & Simpson, M. J. Designing and  
615 interpreting 4D tumour spheroid experiments. *Communications Biology* **5**, 91 (2022).
- 616 [17] Gomes, A. *et al.* Oxygen partial pressure is a rate-limiting parameter for cell proliferation in  
617 3D spheroids grown in physioxic culture condition. *PLoS One* **11**, e0161239 (2016).
- 618 [18] Grimes, D. R. *et al.* The role of oxygen in avascular tumor growth. *PLoS One* **11**, e0153692  
619 (2016).
- 620 [19] Muz, B., de la Puente, P., Azab, F. & Azab, A. B. The role of hypoxia in cancer progression,  
621 angiogenesis, metastasis, and resistance to therapy. *Hypoxia* **3**, 83–92 (2015).
- 622 [20] McKeown, S. R. Defining normoxia, physoxia and hypoxia in tumours-implications for treatment  
623 response. *British Journal of Radiology* **87**, 20130676 (2014).
- 624 [21] Carreau, A., El Hafny-Rahbi, B., Matejuk, A., Grillon, C. & Kieda, C. Why is the partial  
625 oxygen pressure of human tissues a crucial parameter? small molecules and hypoxia. *Journal*  
626 *of Cellular and Molecular Medicine* **15**, 1239–1253 (2011).
- 627 [22] Celora, G. L. *et al.* A DNA-structured mathematical model of cell-cycle progression in cyclic  
628 hypoxia. *Journal of Theoretical Biology* 111104 (2022).
- 629 [23] Lee, P., Chandel, N. S. & Simon, M. C. Cellular adaptation to hypoxia through hypoxia  
630 inducible factors and beyond. *Nature Reviews Molecular Cell Biology* **21**, 268–283 (2020).
- 631 [24] Goto, T., Kaida, A. & Miura, M. Visualizing cell-cycle kinetics after hypoxia/reoxygenation in  
632 heLa cells expressing fluorescent ubiquitination-based cell cycle indicator (Fucci). *Experimental*  
633 *Cell Research* **339**, 389–396 (2015).
- 634 [25] Grist, S. M. *et al.* Long-term monitoring in a microfluidic system to study tumour spheroid  
635 response to chronic and cycling hypoxia. *Scientific Reports* **9**, 17782 (2019).
- 636 [26] Fridman, I. B., Ugolini, G. S., VanDelinder, V., Cohen, S. & Konry, T. High throughput  
637 microfluidic system with multiple oxygen levels for the study of hypoxia in tumor spheroids.  
638 *Biofabrication* **13**, 035037 (2021).
- 639 [27] Riffle, S. & Hegde, R. S. Modeling tumor cell adaptations to hypoxia in multicellular tumor  
640 spheroids. *Journal of Experimental & Clinical Cancer Research* **36**, 102 (2017).
- 641 [28] Al-Ani, A. *et al.* Oxygenation in cell culture: Critical parameters for reproducibility are rou-  
642 tinely not reported. *PLoS One* **13**, e0204269 (2018).



- 643 [29] Sakaue-Sawano, A. *et al.* Visualizing spatiotemporal dynamics of multicellular cell-cycle pro-  
644 gression. *Cell* **132**, 487–498 (2008).
- 645 [30] Spoerri, L., Gunasingh, G. & Haass, N. K. Fluorescence-based quantitative and spatial analysis  
646 of tumour spheroids: a proposed tool to predict patient-specific therapy response. *Frontiers in*  
647 *Digital Health* **3**, 668390 (2021).
- 648 [31] Bull, J. A. & Byrne, H. M. The hallmarks of mathematical oncology. *Proceedings of the IEEE*  
649 1–18 (2022).
- 650 [32] Araujo, R. P. & McElwain, D. L. S. A history of the study of solid tumour growth: the  
651 contribution of mathematical modelling. *Bulletin of Mathematical Biology* **66**, 1039 (2004).
- 652 [33] Byrne, H. M. Dissecting cancer through mathematics: from the cell to the animal model. *Nature*  
653 *Reviews Cancer* **10**, 221–230 (2010).
- 654 [34] Roose, T., Chapman, S. J. & Maini, P. K. Mathematical models of avascular tumor growth.  
655 *SIAM Review* **49**, 179–208 (2007).
- 656 [35] Grimes, D. R., Kelly, C., Bloch, K. & Partridge, M. A method for estimating the oxygen  
657 consumption rate in multicellular tumour spheroids. *Journal of the Royal Society Interface* **11**,  
658 20131124 (2014).
- 659 [36] Santilli, G. *et al.* Mild hypoxia enhances proliferation and multipotency of human neural stem  
660 cells. *PLoS One* **5**, e8575 (2010).
- 661 [37] Grayson, W. L., Zhao, F., Bunnell, B. & Ma, T. Hypoxia enhances proliferation and tissue  
662 formation of human mesenchymal stem cells. *Biochemical and Biophysical Research Communi-*  
663 *cations* **358**, 948–953 (2007).
- 664 [38] Danet, G. H., Pan, Y., Luongo, J. L., Bonnet, D. A. & Simon, M. C. Expansion of human  
665 SCID-repopulating cells under hypoxic conditions. *The Journal of Clinical Investigation* **112**,  
666 126–135 (2003).
- 667 [39] Leedale, J. *et al.* In silico-guided optimisation of oxygen gradients in hepatic spheroids. *Com-*  
668 *putational Toxicology* **12**, 100093 (2019).
- 669 [40] Cavadas, M. A. S., K., N. L. & Cheong, A. Hypoxia-inducible factor (HIF) network insights  
670 from mathematical models. *Cell Communication and Signaling* **11**, 42 (2013).
- 671 [41] Leedale, J. *et al.* Modeling the dynamics of hypoxia inducible factor-1 $\alpha$  (HIF-1 $\alpha$ ) within single  
672 cells and 3D cell culture systems. *Mathematical Biosciences* **258**, 33–43 (2014).
- 673 [42] Lewin, T. D., Maini, P. K., Moros, E. G., Enderling, H. & Byrne, H. M. The evolution of  
674 tumour composition during fractionated radiotherapy implications for outcome. *Bulletin of*  
675 *Mathematical Biology* **80**, 1207–1235 (2018).



- 676 [43] Pawitan, Y. *In All Likelihood: Statistical Modelling And Inference Using Likelihood* (Oxford  
677 University Press, Oxford, UK, 2001).
- 678 [44] Simpson, M. J., Baker, R. E., Vittadello, S. T. & Maclaren, O. J. Practical parameter identi-  
679 fiability for spatio-temporal models of cell invasion. *Journal of the Royal Society Interface* **17**,  
680 2020055 (2020).
- 681 [45] Browning, A. P., Haridas, P. & Simpson, M. J. A Bayesian sequential learning framework to  
682 parameterise continuum models of melanoma invasion into human skin. *Bulletin of Mathematical*  
683 *Biology* **81**, 676–698 (2019).
- 684 [46] Collis, J. *et al.* Bayesian calibration, validation and uncertainty quantification for predictive  
685 modelling of tumour growth: a tutorial. *Bulletin of Mathematical Biology* **79**, 939–974 (2017).
- 686 [47] Gelman, A. *et al.* *Bayesian Data Analysis* (Chapman and Hall/CRC, New York, 2013), 3 edn.
- 687 [48] Haario, H., Saksman, E. & Tamminen, J. An adaptive Metropolis algorithm. *Bernoulli* **7**,  
688 223–242 (2001).
- 689 [49] Haario, H., Laine, M., Mira, A. & Saksman, E. DRAM: Efficient adaptive MCMC. *Statistics*  
690 *and Computing* **16**, 339–354 (2006).
- 691 [50] Hsu, M. Y., Elder, D. E. & Herylyn, M. Melanoma: the Wistar melanoma (WM) cell lines.  
692 *Human Cell Culture* **1**, 259–274 (2002).
- 693 [51] Hoek, K. S. *et al.* Metastatic potential of melanomas defined by specific gene expression profiles  
694 with no BRAF signature. *Pigment Cell Research* **19**, 290–302 (2006).
- 695 [52] Smalley, K. S. M. *et al.* An organometallic protein kinase inhibitor pharmacologically activates  
696 p53 and induces apoptosis in human melanoma cells. *Cancer Research* **67**, 209–217 (2007).
- 697 [53] Smalley, K. S. M. *et al.* Ki67 expression levels are a better marker of reduced melanoma growth  
698 following MEK inhibitor treatment than phospho-ERK levels. *British Journal of Cancer* **96**,  
699 445–449 (2007).
- 700 [54] Uphoff, C. C. & Drexler, H. G. Detecting mycoplasma contamination in cell cultures by poly-  
701 merase chain reaction. *Methods in Molecular Biology* **731**, 93–103 (2011).
- 702 [55] Gunasingh, G., Browning, A. P. & Haass, N. K. Rapid optical clearing for high-throughput  
703 analysis of tumour spheroids. *Preprints* (2021).
- 704 [56] Cold Spring Harbor Laboratory Press. Antibody dilution buffer (Abdil) (2018). Accessed:  
705 November 2021.
- 706 [57] Costa, E. C., Silva, D. B., Moreira, A. F. & Correia, I. J. Optical clearing methods: an overview  
707 of the techniques used for the imaging of 3D spheroids. *Biotechnology & Bioengineering* **116**,  
708 2742–2763 (2019).

- 709 [58] Susaki, E. A. *et al.* Versatile whole-organ/body staining and imaging based on electrolyte-gel  
710 properties of biological tissues. *Nature Communications* **11**, 1982 (2020).
- 711 [59] Browning, A. P. & Murphy, R. J. Image processing algorithm to identify structure of tu-  
712 mour spheroids with cell cycle labelling. *Zenodo* (2021). [https://doi.org/10.5281/zenodo.](https://doi.org/10.5281/zenodo.5121093)  
713 **5121093**.
